# Supplementary material
Source: publisher figshare collection journal article supplement (https://acs.figshare.com/ndownloader/files/4777756)

# A *SeCSe*-Pd(II) Pincer Complex as Highly Efficient Catalyst for Allylation of Aldehydes with Allyltributyltin

Qingwei Yao and Mathew Sheets

Department of Chemistry and Biochemistry, The Michael Faraday Laboratories,  
Northern Illinois University,  
DeKalb, Illinois 60115

## CONTENTS

|                                                                                                                                                            |     |
|------------------------------------------------------------------------------------------------------------------------------------------------------------|-----|
| General                                                                                                                                                    | 2S  |
| Synthesis of the <i>SeCSe</i> -Pd(II) Pincer Complex 4                                                                                                     | 2S  |
| Allylation of Aldehydes with Allyltributyltin in the Presence of the <i>SeCSe</i> -Pd(II) Pincer Catalyst 4. <i>Representative Procedure</i>               | 3S  |
| Table S-1. Allylation of Aldehydes with Allyltributyltin 7                                                                                                 |     |
| Using the Pd-Complex 4 as Catalyst                                                                                                                         | 4S  |
| <sup>1</sup> H NMR Spectroscopic Study on the Reaction of the Pd Complex 4 with Allyltributyltin 7: <i>Identification of the Transmetalation Product 9</i> | 5S  |
| NMR Spectroscopic data of Compounds 8b-8g                                                                                                                  | 8S  |
| References                                                                                                                                                 | 10S |
| <sup>1</sup> H NMR Spectrum of Compound 4                                                                                                                  | 11S |
| <sup>13</sup> C NMR Spectrum of Compound 4                                                                                                                 | 12S |
| <sup>1</sup> H NMR Spectrum of Compound 8a                                                                                                                 | 13S |
| <sup>13</sup> C NMR Spectrum of Compound 8a                                                                                                                | 14S |
| <sup>1</sup> H NMR Spectrum of Compound 8b                                                                                                                 | 15S |
| <sup>13</sup> C NMR Spectrum of Compound 8b                                                                                                                | 16S |
| <sup>1</sup> H NMR Spectrum of Compound 8c                                                                                                                 | 17S |
| <sup>13</sup> C NMR Spectrum of Compound 8c                                                                                                                | 18S |
| <sup>1</sup> H NMR Spectrum of Compound 8d                                                                                                                 | 19S |
| <sup>13</sup> C NMR Spectrum of Compound 8d                                                                                                                | 20S |
| <sup>1</sup> H NMR Spectrum of Compound 8e                                                                                                                 | 21S |
| <sup>13</sup> C NMR Spectrum of Compound 8e                                                                                                                | 22S |
| <sup>1</sup> H NMR Spectrum of Compound 8f                                                                                                                 | 23S |
| <sup>13</sup> C NMR Spectrum of Compound 8f                                                                                                                | 24S |
| <sup>1</sup> H NMR Spectrum of Compound 8g                                                                                                                 | 25S |
| <sup>13</sup> C NMR Spectrum of Compound 8g                                                                                                                | 26S |

### Experimental Section

**General.** Aldehydes were obtained from commercial sources. Their purity was checked by  $^1\text{H}$  NMR and, whenever necessary, purified by distillation or chromatography to ensure no carboxylic acid was present. Allyltributyltin was purchased from Aldrich and used as received. THF was distilled from sodium/benzophenone under a nitrogen atmosphere prior to use. *N,N*-Dimethylformamide (DMF) (anhydrous; Sure-Seal bottle) was purchased from Aldrich. *N,N*-Dimethylacetamide (DMA) and DMSO were dried and freshly distilled over molecular sieves. THF- $d_8$  was purchased from Cambridge Chemicals and dried over flamed dried molecular sieves prior to use. Unless otherwise indicated,  $^1\text{H}$  and  $^{13}\text{C}$  NMR spectra were recorded at 25 °C in  $\text{CDCl}_3$  at 500 and 125 MHz, respectively. Chemical shifts (ppm) were obtained by referencing to  $\text{CDCl}_3$  as a standard. Flash chromatography was performed on grade 60 silica gel (32-63 $\mu\text{m}$ ) obtained from commercial sources. All reactions were performed under an argon atmosphere by standard Schlenk techniques. All reactions were performed in duplicate.

**Synthesis of the SeCSe-Pd(II) Pincer Complex 4.** An oven-dried flask was charged with bis-selenide ligand **5**<sup>11</sup> (435 mg, 1.045 mmol) and 1 mL of glacial HOAc. Palladium acetate (236 mg, 1.05 mmol) was then added followed by an additional 1 mL of HOAc. The reaction mixture was heated to 116 °C and maintained at gentle reflux for 3h. After the reaction was cooled to rt and HOAc removed in vacuo, the crude reaction product was dissolved in dichloromethane (2 mL). Hexanes (10 mL) were then added and the product precipitated as a yellow crystalline solid. The precipitates were allowed to settle and the solvent was decanted. This process was repeated three times and the purified product was dried on vacuum line overnight to give pure **4** (498 mg, 82%) as a bright yellow solid, m.p. 185-188 °C. Spectroscopic analysis showed that this material exists as a diastereomeric mixture in a ratio of 3:2.  $^1\text{H}$  NMR (500MHz,  $\text{CDCl}_3$ ):  $\delta$  7.98 (dd,  $J$  = 1.86 and 7.7 Hz, major diastereomer) and 7.91 (d,  $J$  = 7.2 Hz, minor diastereomer)

(4 H in total), 7.33-7.41 (m, 6H), 6.87-6.94 (m, 3H), 4.573 (minor, d,  $J = 14.2$  Hz) and 4.568 (d,  $J = 13.7$  Hz, major diastereomer) (2 H in total), 4.32 (d,  $J = 13.7$  Hz, major) and 4.21 (d,  $J = 14.1$  Hz, minor diastereomer) (2 H in total), 1.84 (bs, minor diastereomer) and 1.71 (bs, major diastereomer) (3 H in total).  $^{13}\text{C}$  NMR (125Hz,  $\text{CDCl}_3$ ):  $\delta$  177.2 (minor diastereomer) and 176.9 (major diastereomer), 152.7 (minor diastereomer) and 152.3 (major diastereomer), 150.7 (minor diastereomer) and 150.1 (major diastereomer), 133.3 (major diastereomer) and 133.2 (minor diastereomer), 130.0, 129.8, 129.59, 129.56 and 129.4 (isomeric peaks of 3 C), 124.5 (major diastereomer) and 124.3 (minor diastereomer), 123.7 (minor diastereomer) and 123.6 (major diastereomer), 43.0 (major diastereomer) and 42.4 (minor diastereomer), 23.6 (minor diastereomer) and 23.5 (major diastereomer). Anal. Calcd. for  $\text{C}_{22}\text{H}_{20}\text{O}_2\text{PdSe}_2$ : C, 45.50; H, 3.47. Found: C, 45.45; H, 3.48.

**Allylation of Aldehydes with Allyltributyltin in the Presence of the *SeCSe*-Pd(II) Pincer Catalyst**

**4. Representative Procedure:** Allylation of 4-bromobenzaldehyde (**6a**) with allyltributyltin (**7**) in the presence of **4** (Table 1, entry 6). A flame-dried Schlenk flask was charged with aldehyde **6a** (92.5 mg, 0.5 mmol), DMF (0.5 mL) and catalyst **4** (2.9 mg, 0.0050 mmol) under argon. Allyltributyltin (**7**) (186  $\mu\text{L}$ , 199 mg, 0.6 mmol) was then added via syringe. The flask was sealed and heated to 40  $^\circ\text{C}$  (bath temperature) for 18 h. After cooling to rt, the reaction mixture was poured into water and extracted with ether. The combined extracts were stirred with aqueous KF (10%, w/v) overnight. The organic layer was then separated, washed with brine, dried ( $\text{Na}_2\text{SO}_4$ ) and concentrated. The crude product was purified by flash column chromatography (hexanes/EtOAc 8:1) to give the known homoallyl alcohol **8a**<sup>1</sup> (106 mg, 93%) as a colorless oil. The reaction was repeated one more time and the product was isolated in 95% yield.  $^1\text{H}$  NMR (200 MHz):  $\delta$  7.48 (d, 2 H,  $J = 8.5$  Hz), 7.22 (d, 2 H  $J = 8.3$  Hz), 5.68-5.88 (m, 1

H), 5.10-5.21 (m, 2 H), 4.67 (t, 1 H,  $J = 6.4$  Hz), 2.64 (bs, 1 H, alcohol), 2.44-2.51(m, 2 H).  $^{13}\text{C}$  NMR (50 MHz):  $\delta$  142.84, 133.97, 131.43, 127.61, 121.21, 118.69, 72.65, 43.69.

Reactions (each in duplicate) of other aldehydes under a variety of conditions were performed according to the general procedure with appropriate adjustment of the solvent used and the reaction time and temperature. The results were given in Table S-1.

**TABLE S-1.** Allylation of Aldehydes with Allyltributyltin **7** Using the Pd-Complex **4** as Catalyst

| entry | aldehyde | mmol | mol % <b>4</b>              | Solvent       | conditions  | yield <sup>b, c</sup> |
|-------|----------|------|-----------------------------|---------------|-------------|-----------------------|
| 1     |          | 1.0  | 1                           | THF (1 mL)    | rt (18h)    | 86.5                  |
| 2     |          | 0.5  | 1                           | THF ((0.5 mL) | rt (24h)    | 92.5                  |
| 3     |          | 1.0  | 1                           | THF (1 mL)    | 40 °C (18h) | 67.5                  |
| 4     |          | 0.5  | 1                           | THF (0.5 mL)  | 60 °C (18h) | 64                    |
| 5     |          | 0.5  | 1                           | DMF (0.5 mL)  | rt (18h)    | 77                    |
| 6     |          | 0.5  | 1                           | DMF (0.5 mL)  | 40 °C (18h) | 94                    |
| 7     |          | 0.5  | 1                           | DMF (0.5 mL)  | 60 °C (18h) | 96                    |
| 8     |          | 0.5  | 1                           | DMSO (0.5 mL) | rt (18h)    | 86.5                  |
| 9     |          | 0.5  | 1                           | DMSO (0.5 mL) | 40 °C (18h) | 96.5                  |
| 10    |          | 0.5  | 1                           | DMSO (0.5 mL) | 60 °C (18h) | 97                    |
| 11    |          | 1.0  | 1                           | DMF (1 mL)    | rt (36h)    | 87.5                  |
| 12    |          | 1.0  | 1                           | DMF (1 mL)    | 40 °C (2h)  | 66.5                  |
| 13    |          | 1.0  | 1                           | DMF (1 mL)    | 40 °C (4h)  | 77.5                  |
| 14    |          | 1.0  | 1                           | DMF (1 mL)    | 40 °C (6h)  | 87                    |
| 15    |          | 0.5  | 1                           | DMF (0.5 mL)  | 40 °C (18h) | 92.5                  |
| 16    |          | 2.0  | 0.25                        | DMF (1 mL)    | 40 °C (24h) | 92                    |
| 17    |          | 2.0  | 0.02                        | DMF (1 mL)    | 40 °C (40h) | 95.5                  |
| 18    |          | 1.0  | 1 ( <b>1</b> ) <sup>d</sup> | DMF (1 mL)    | 40 °C (18h) | 54                    |
| 19    |          | 1.0  | none <sup>e</sup>           | DMF (0.5 mL)  | 40 °C (18h) | <1 <sup>f</sup>       |
| 20    |          | 1.0  | 1 ( <b>2</b> ) <sup>g</sup> | DMF (1 mL)    | 40 °C (18h) | 74                    |
| 21    |          | 0.5  | 1                           | DMF (0.5 mL)  | 60 °C (18h) | 58.5                  |
| 22    |          | 0.5  | 1                           | DMSO (0.5 mL) | 60 °C (18h) | 22.5                  |
| 23    |          | 2.0  | 1                           | DMA (1 mL)    | 60 °C (18h) | 64.5                  |
| 24    |          | 1.0  | 1                           | DMF (0.5 mL)  | rt (24h)    | 95                    |
| 25    |          | 1.0  | 1                           | DMF (0.5 mL)  | 40 °C (6h)  | 95.5                  |
| 26    |          | 2.0  | 0.25                        | DMF (1 mL)    | 40 °C (18h) | 95.5                  |
| 27    |          | 4.0  | 0.1                         | DMF (2 mL)    | 40 °C (40h) | 95.5                  |
| 28    |          | 2.0  | 0.02                        | DMF (1 mL)    | 40 °C (24h) | 95.5                  |
| 29    |          | 2.0  | 0.005                       | DMF(2 mL)     | 40 °C (40h) | 73.5                  |
| 30    |          | 2.0  | 0.005                       | DMF(2 mL)     | 40 °C (96h) | 79.5                  |
| 31    |          | 1.0  | 1                           | DMF (0.5 mL)  | rt (24h)    | 94.5                  |
| 32    |          | 4.0  | 0.1                         | DMF (2 mL)    | 40 °C (40h) | 95.5                  |
| 33    |          | 1.0  | 1                           | DMF (0.5 mL)  | 40 °C (40h) | 66.5                  |
| 34    |          | 1.0  | 1                           | DMF (0.5 mL)  | 40 °C (18h) | 47                    |
| 35    |          | 2.0  | 1                           | DMF (1 mL)    | 60 °C (24h) | 59                    |

<sup>a</sup> All reactions were performed with 1 eq of **6** and 1.2 eq of **7** under conditions as indicated. <sup>b</sup> Referred to isolated yield after column chromatography on silica gel. <sup>c</sup> Average of two runs. <sup>d</sup> The *SeCSe*-Pd(II) pincer complex **1** was used. <sup>e</sup> This control reaction was performed in the absence of any catalyst. <sup>f</sup> Not detected by  $^1\text{H}$  NMR. <sup>g</sup> The *Se*-palladacycle **2** was used.

**<sup>1</sup>H NMR Spectroscopic Study on the Reaction of the Pd Complex **4** with Allyltributyltin**

**7: Identification of the Transmetalation Product **9**.** An NMR tube (5 mm) was charged with **4** (4.6 mg, 0.008 mmol) and 600  $\mu$ L of degassed THF- $d_8$  was added under an Ar atmosphere. The NMR tube was cooled to  $-5^\circ\text{C}$  and  $^1\text{H}$  NMR spectrum (at 500 MHz with  $d1 = 10\text{s}$ ) was recorded. Due to the chiral nature of the Pd-bound selenium, there exist two diastereomers, *cis*- and *trans*-**4** (**Scheme S-1**) as evidenced by the two diastereotopic  $\text{SeCH}_2$  groups corresponding to each of the diastereomers. Each of the  $\text{SeCH}_2$  groups appears as two doublets (**Figure S-1**). Allyltributyltin **7** (24.5  $\mu$ L, 26.5 mg, 0.080 mmol) was then added and the temperature of the NMR probe was raised to  $25^\circ\text{C}$ . After 20 min at this temperature, **4** was converted to a new compound in about 50% conversion. This new compound was identified as the transmetalation product **9- $\eta^1$** . The  $^1\text{H}$  NMR spectrum of the reaction mixture at  $-5^\circ\text{C}$  was shown in **Figure S-2**. The spectrum assignments for compounds **4**, **7** and **9** were shown in **Figure S-3**. The 2D proton COSY NMR spectra of the reaction mixture were shown in **Figures S-4.A** and **S-4.B**.

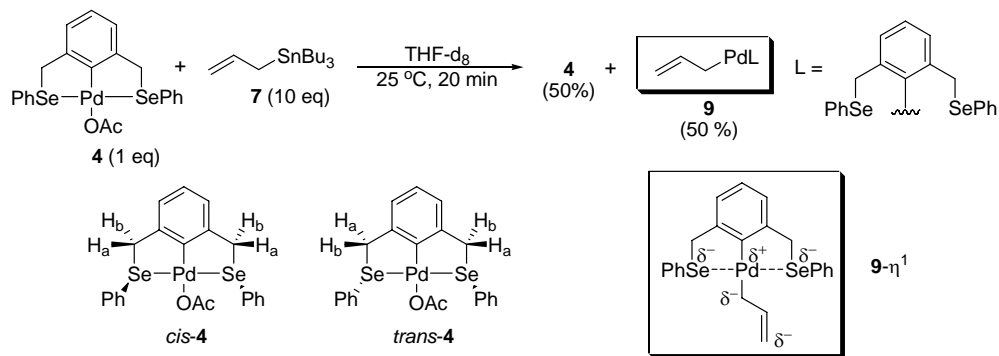

**SCHEME S-1.** Reaction of Pd Complex **4** with Allyltributyltin **7** in THF- $d_8$ .

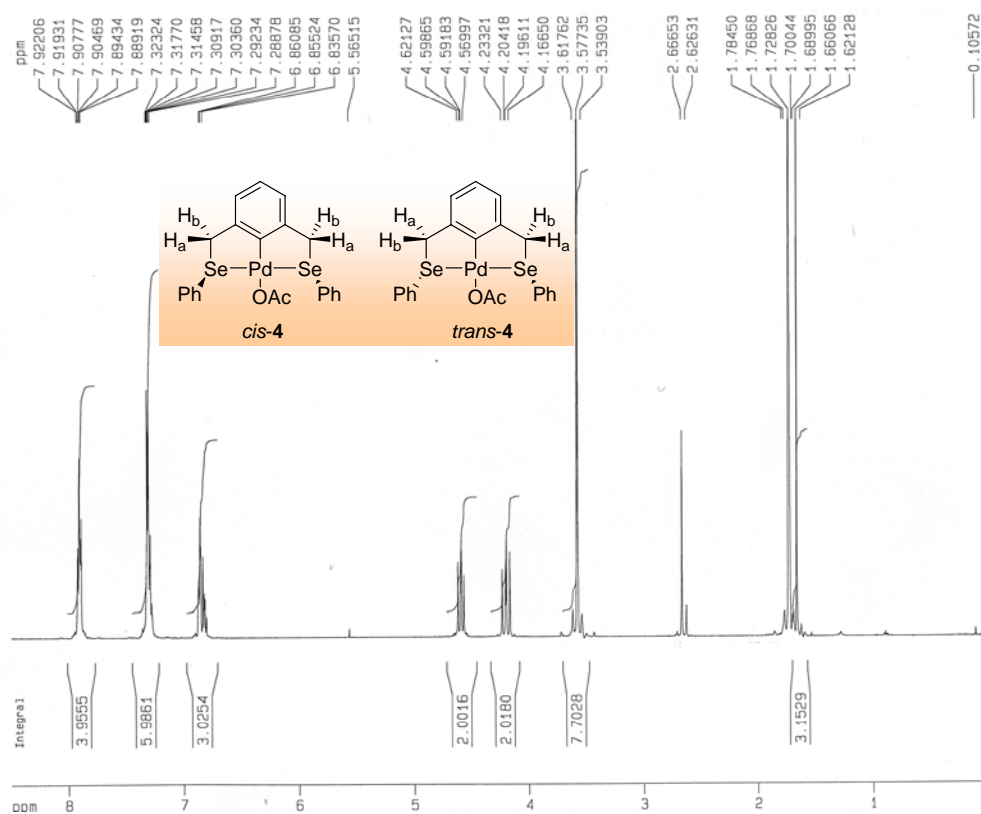

**FIGURE S-1.**  $^1\text{H}$  NMR Spectrum of **4** in  $\text{THF-d}_8$  to  $25^\circ\text{C}$ .

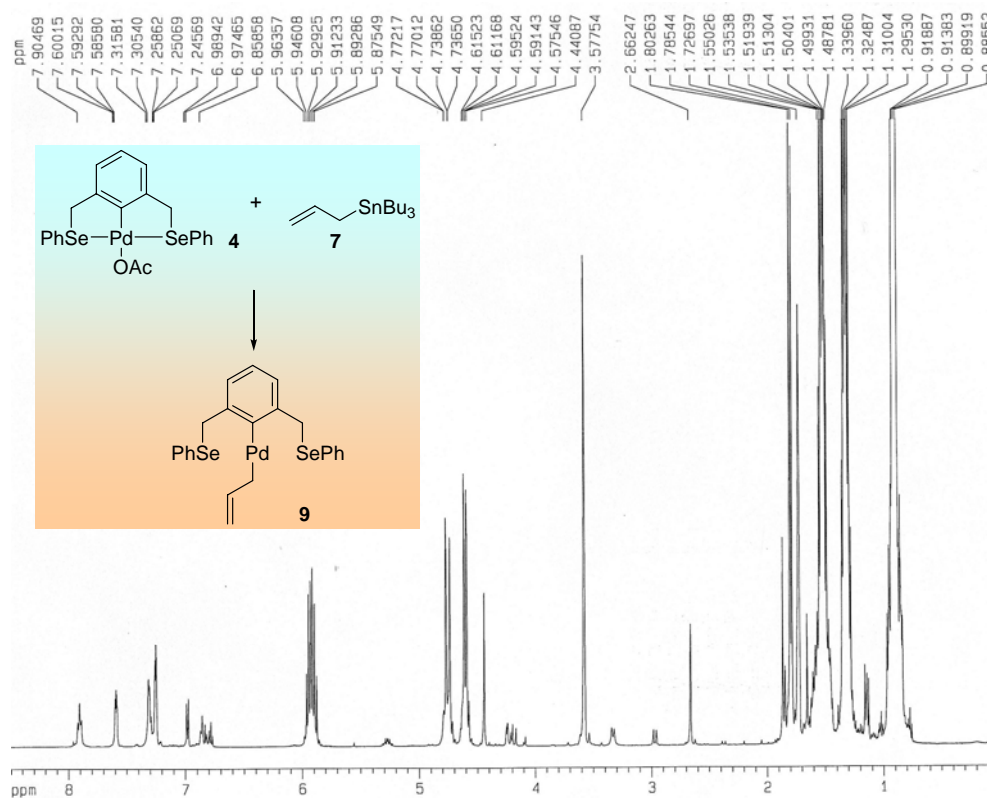

**FIGURE S-2.**  $^1\text{H}$  NMR Spectrum of the Reaction Mixture of **4** and **7**.

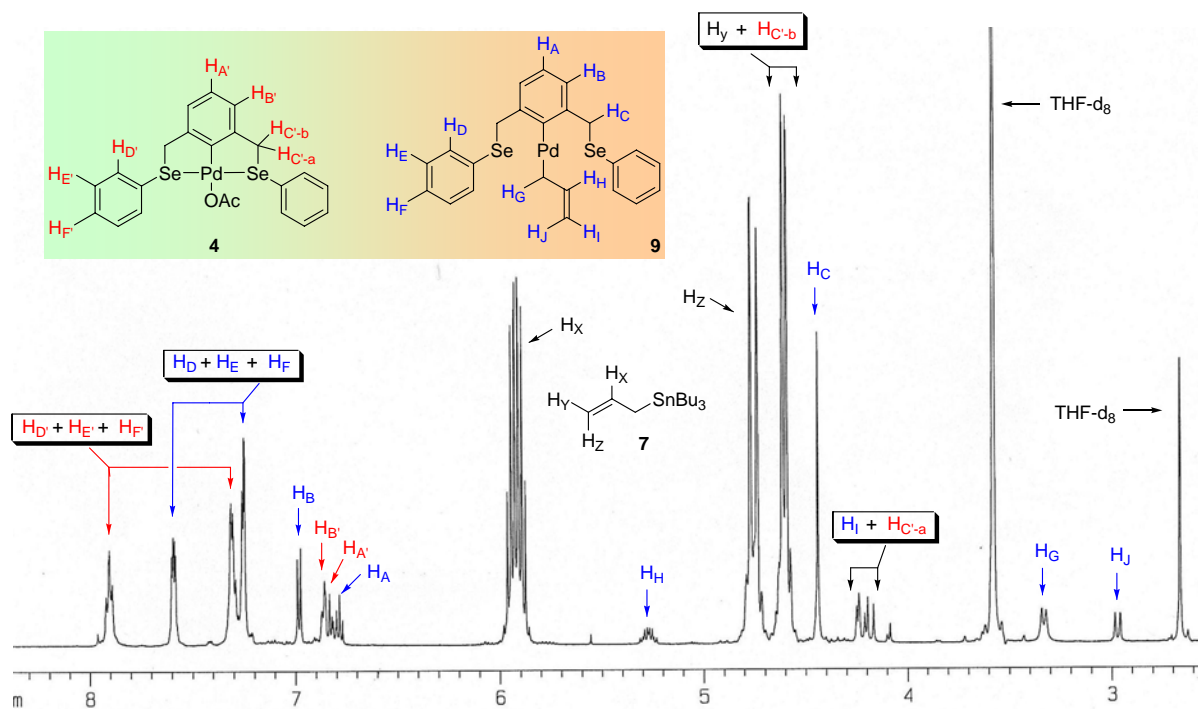

**FIGURE S-3.** Partial 500 MHz  $^1\text{H}$  NMR Spectrum and Spectrum Assignments for the Crude Reaction Mixture Containing **4**, **7** and the Allyl-Pd(II) Complex **9**<sup>14</sup> in THF- $d_8$  at  $-5^\circ\text{C}$ .

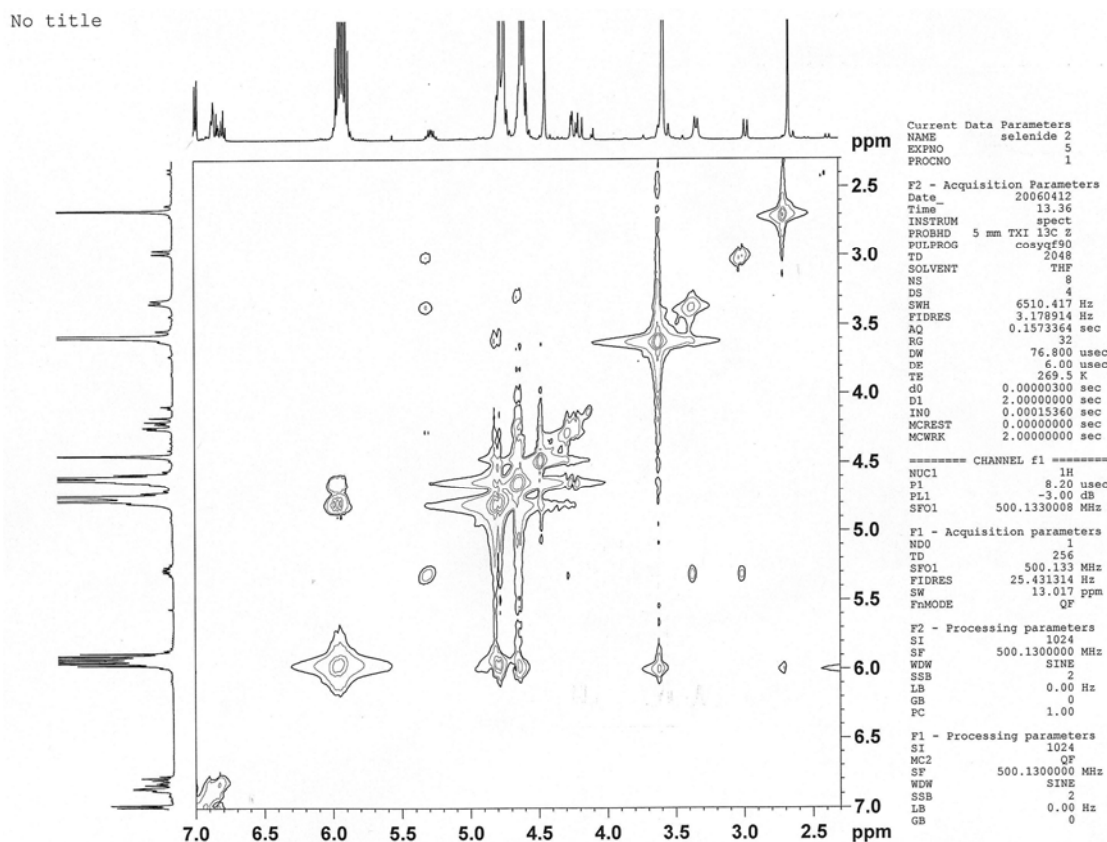

**FIGURE S-4.** A. 2D COSY Spectrum (Plot A) of the Crude Reaction Mixture of **4** and **7**.

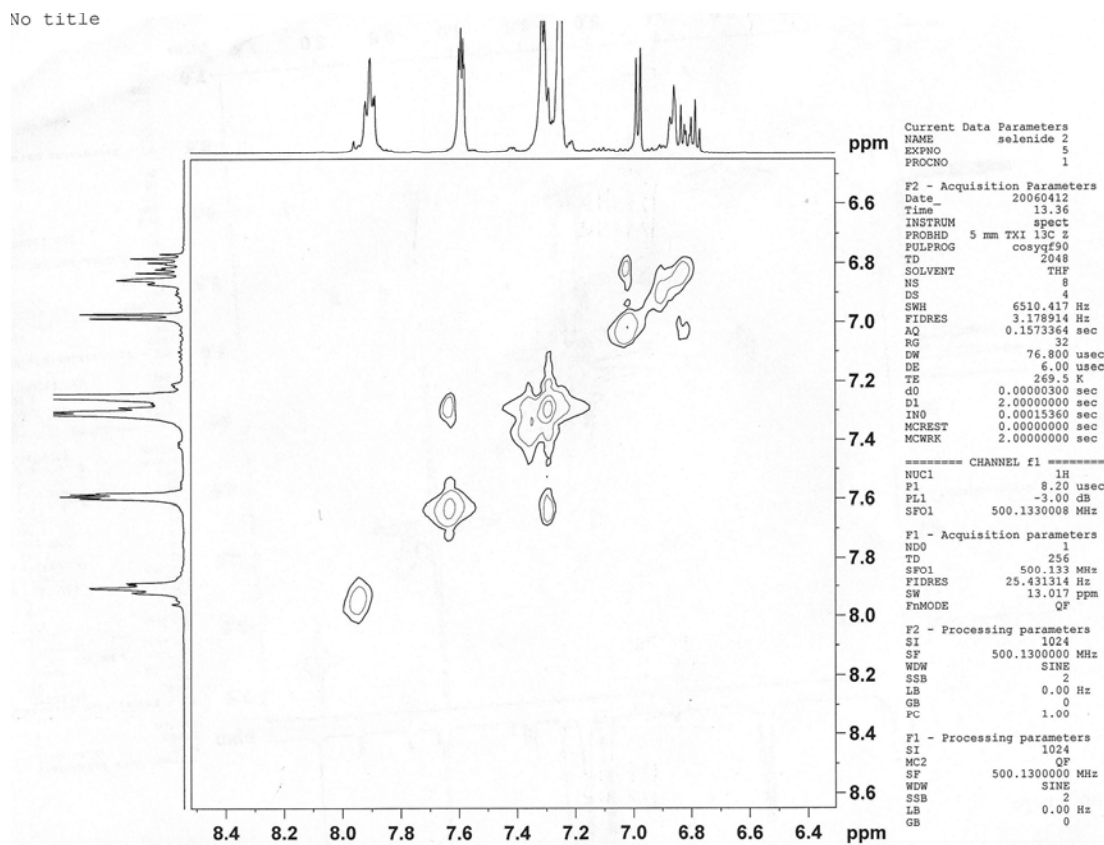

**Figure S-4. B.** 2D COSY Spectrum (Plot B) of the Reaction Mixture of **4** and **7**.

**Phenylbut-3-en-1-ol (8b)<sup>2</sup>**

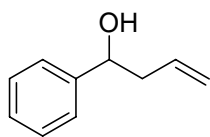

<sup>1</sup>H NMR:  $\delta$  7.29-7.41 (m, 5 H), 5.79-5.88 (m, 1 H), 5.15-5.20 (m, 2H), 4.71 (t, 1H  $J$  = 6.5 Hz), 2.79 (bs, 1 H alcohol), 2.54 (t, 2 H,  $J$  = 6.8). <sup>13</sup>C NMR:  $\delta$  144.22, 134.74, 128.39, 127.47, 126.08, 117.85, 73.56, 43.72.

**1-(4-Methoxyphenyl)but-3-en-1-ol (8c)<sup>1,3</sup>**

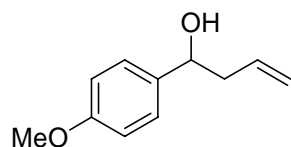



$^1\text{H}$  NMR:  $\delta$  7.30 (d, 2 H,  $J = 8.5$  Hz), 6.90 (d, 2 H,  $J = 8.5$  Hz), 5.78-5.86 (m, 1 H), 5.13-5.18 (m, 2 H), 4.69 (t, 1 H,  $J = 6.5$  Hz), 3.82 (s, 3 H), 2.52 (t, 2H,  $J = 7.0$  Hz), 2.18 (bs, 1 H, alcohol).  $^{13}\text{C}$  NMR:  $\delta$  159.07, 136.14, 134.65, 127.09, 118.11, 113.64, 73.03, 55.28, 43.64.

**1-(4-Nitrophenyl)but-3-en-1-ol (8d)**<sup>1b,3c</sup>

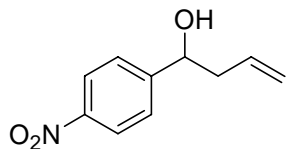

$^1\text{H}$  NMR:  $\delta$  8.14 (d, 2 H,  $J = 8.5$  Hz), 7.52 (d, 2 H,  $J = 8.5$  Hz), 5.74-5.82 (m, 1 H), 5.11-5.15 (m, 2 H), 4.87 (t, 1 H,  $J = 6.0$  Hz), 3.17 (bs, 1H, alcohol), 2.45-2.56 (m, 2 H).  $^{13}\text{C}$  NMR:  $\delta$  151.52, 147.067, 133.36, 126.65, 123.46, 118.96, 72.35, 43.61.

**4-(1-Hydroxybut-3-enyl)benzonitrile (8e)**<sup>3c</sup>

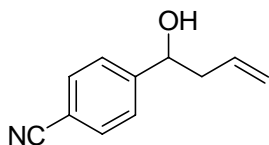

$^1\text{H}$  NMR:  $\delta$  7.56 (d, 2 H,  $J = 8.0$  Hz), 7.43 (d, 2 H,  $J = 7.5$  Hz), 5.69-5.77 (m, 1 H), 5.07-5.11 (m, 2H), 4.75 (t,  $J = 6.1$  Hz), 3.08 (bs, 1H, alcohol), 2.39-2.50 (m, 2H).  $^{13}\text{C}$  NMR:  $\delta$  149.56, 133.50, 132.12, 126.61, 118.9, 110.81, 72.48, 43.62.

**Phenyl-5-hexen-3-ol (8f)**<sup>4</sup>

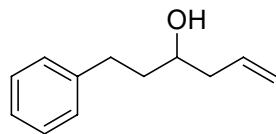

$^1\text{H}$  NMR:  $\delta$  7.20-7.38 (m, 5 H), 5.78-5.90 (m, 1 H), 5.13-5.19 (m, 2 H), 3.71 (m, 1 H), 2.67-2.89 (m, 2 H), 2.18-2.40 (m, 2 H), 1.76-1.86 (m, 2H), 1.66 (bs, 1 H, alcohol).  $^{13}\text{C}$  NMR:  $\delta$  142.07, 134.63, 128.48, 128.44, 125.87, 118.51, 69.88, 42.12, 38.48, 32.08

**Undec-1-en-4-ol (8g)**<sup>1b,5</sup>

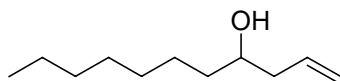

$^1\text{H}$  NMR:  $\delta$  5.81-5.88 (m, 1 H), 5.02-5.18 (m, 2 H), 3.60-3.67 (m, 1H), 2.25-2.29 (m, 1 H), 2.20-2.11 (m, 2 H), 1.71 (bs, 1 H, alcohol), 1.49-1.28 (m, 12 H), 0.89 (t, 1 H,  $J = 7.0\text{Hz}$ ).  $^{13}\text{C}$  NMR:  $\delta$  134.94, 117.66, 70.75, 41.91, 36.84, 31.77, 29.58, 29.20, 25.60, 22.56, 13.93.

### References

- (1) (a) Yanagisawa, A.; Kageyama, H.; Nakatsuka, Y.; Asakawa, K.; Matsumoto, Y.; Yamamoto, H. *Angew. Chem., Int. Ed.* **1998**, 38, 3701. (b) Thadani, A. N.; Batey, R. A. *Org. Lett.* **2002**, 4, 3827.
- (2) (a) Dussault, P. H.; Lee, H.-J.; Liu, X. *J. Chem. Soc., Perkin Trans.1* **2000**, 3006. (b) Cai, M.; Huang, Y.; Zhao, H.; Zhang, R. *J. Organomet. Chem.* **2004**, 689, 2436.
- (3) (a) Shibato, A.; Itagaki, Y.; Tayama, E.; Hokke, Y.; Asao, N.; Maruoka, K. *Tetrahedron* **2000**, 56, 5373. (b) Doucet. H.; Santelli, M. *Tetrahedron: Asymmetry* **2000**, 11, 4163. (c) Fürstner, A.; Voigtlaender, D. *Synthesis* **2000**, 959.
- (4) (a) Akiyama, T.; Iwai, J.; Sugano, M. *Tetrahedron* **1999**, 55, 7499. (b) Fujioka, H.; Ohba, Y.; Hirose, H.; Murai, K.; Kita, Y. *Org. Lett.* **2005**, 7, 3303.
- (5) Fürstner, A.; Shi, N. *J. Am. Chem. Soc.* **1996**, 118, 12349.

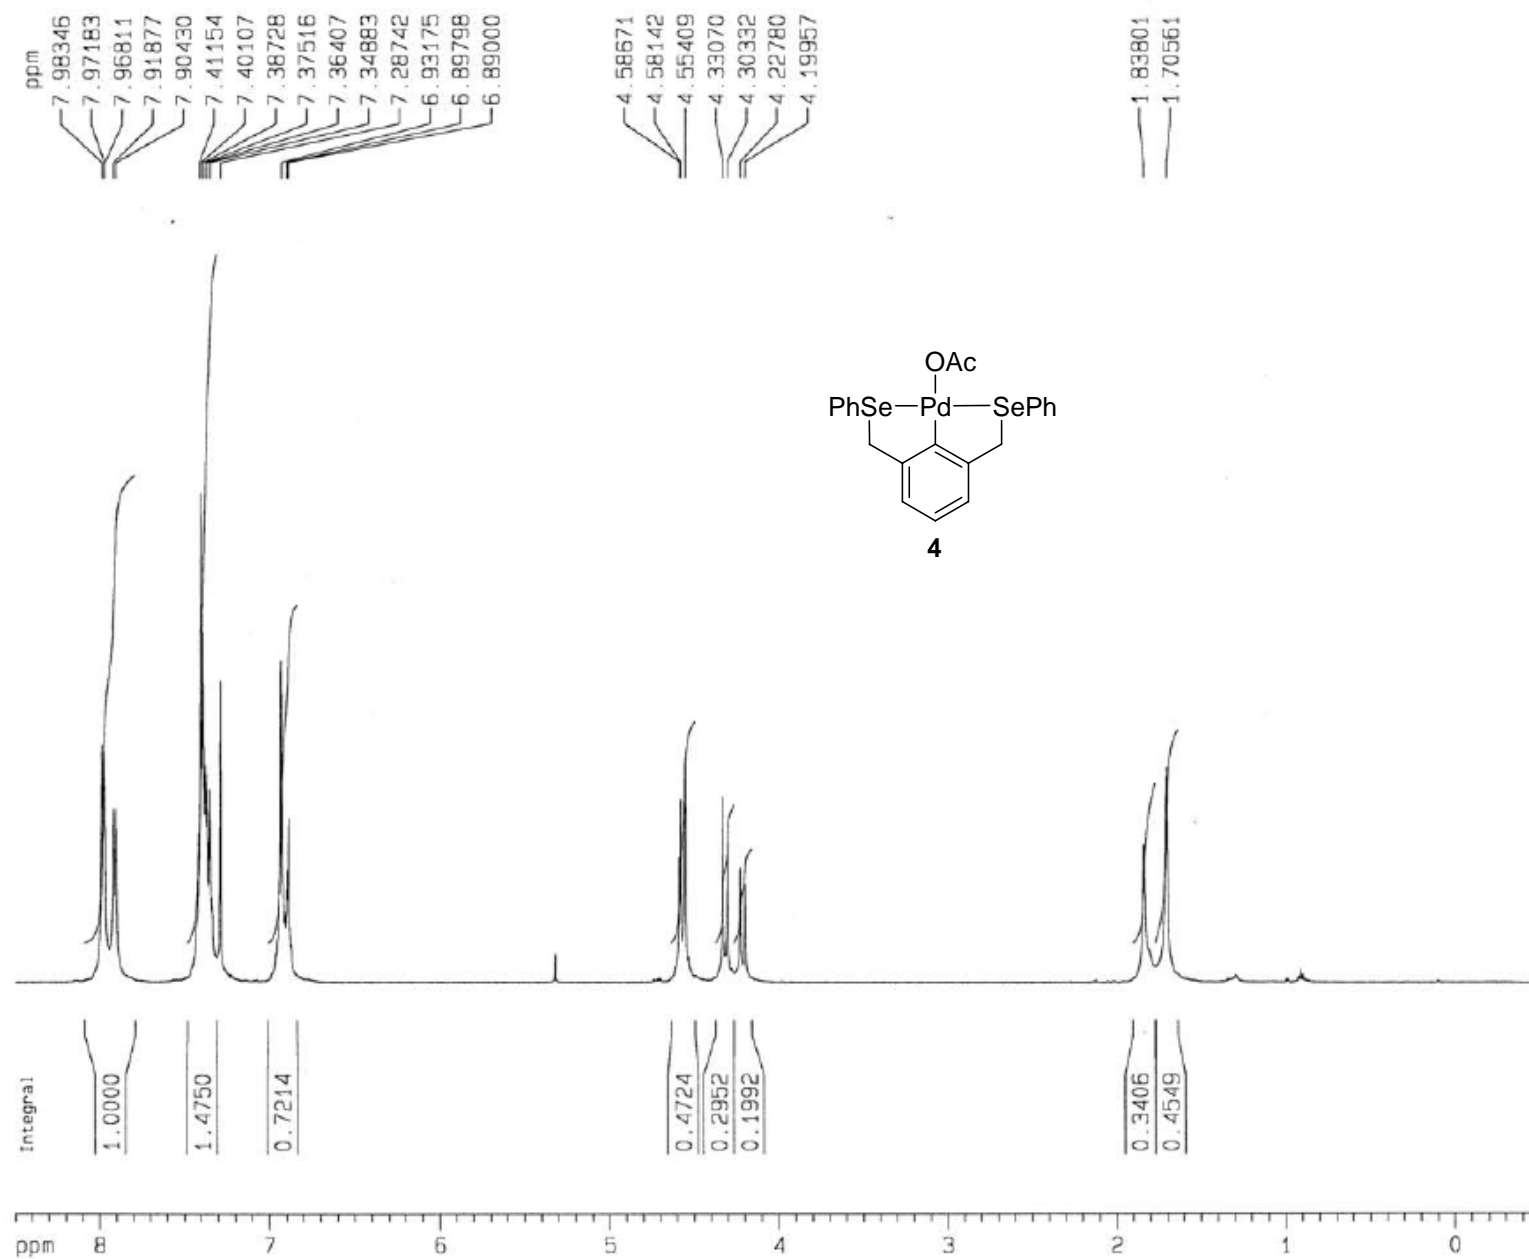

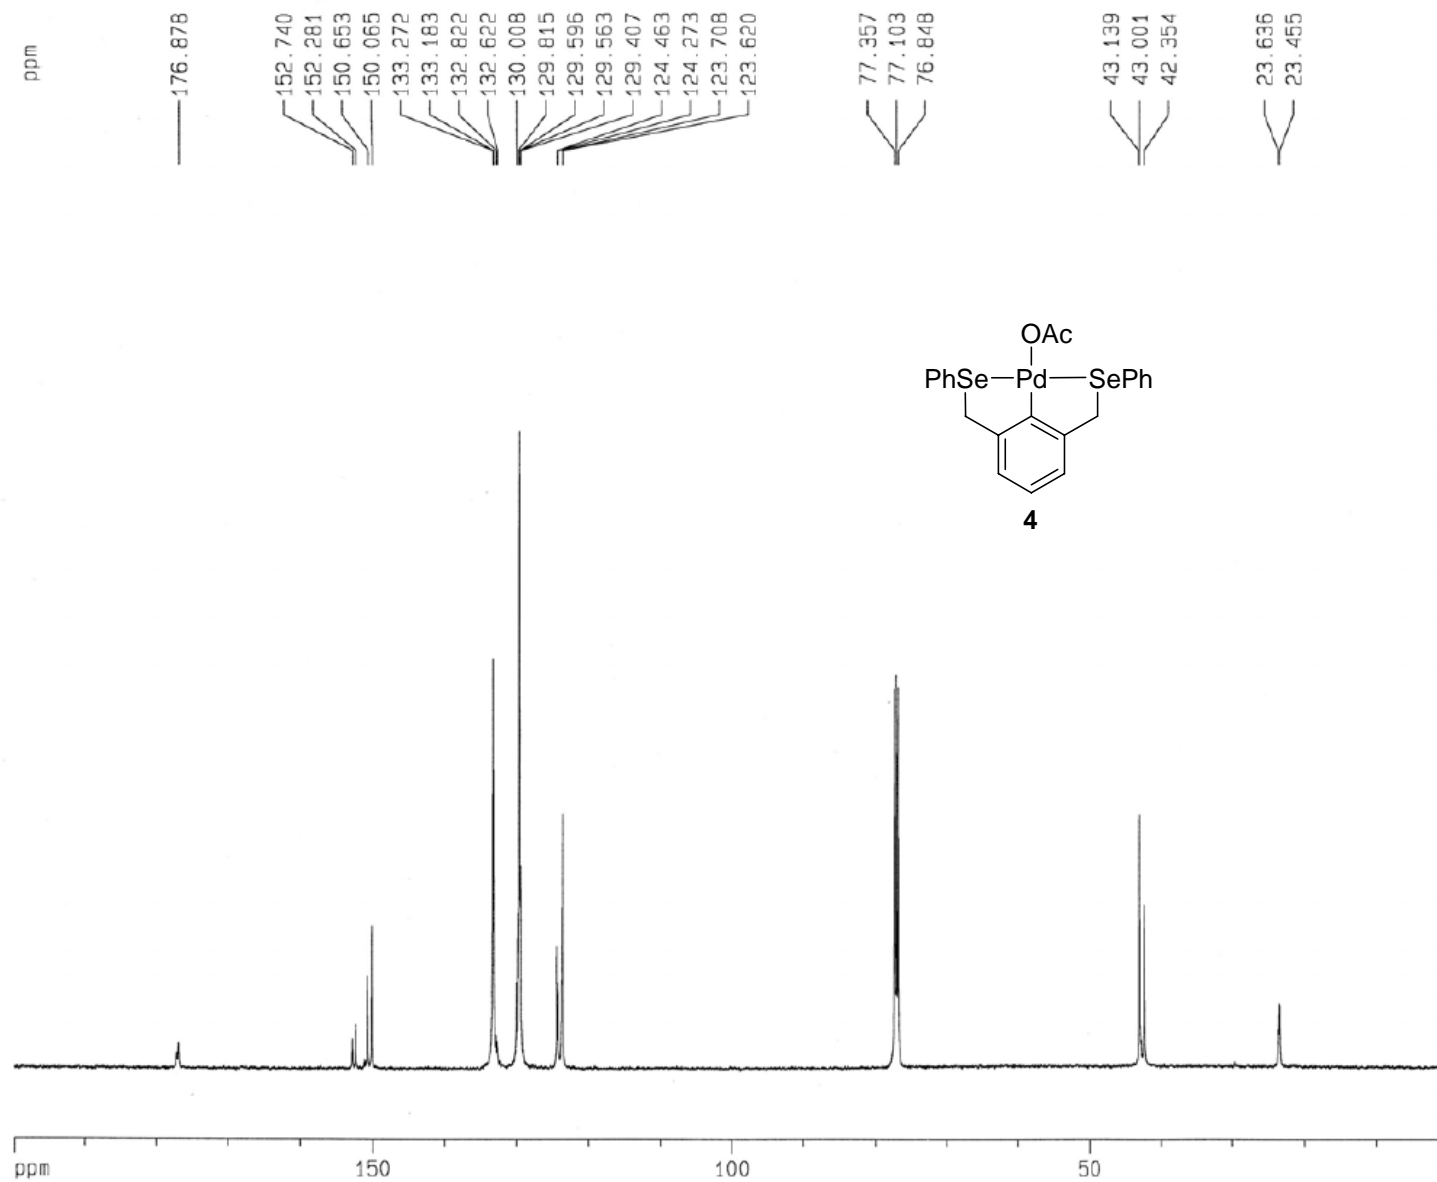

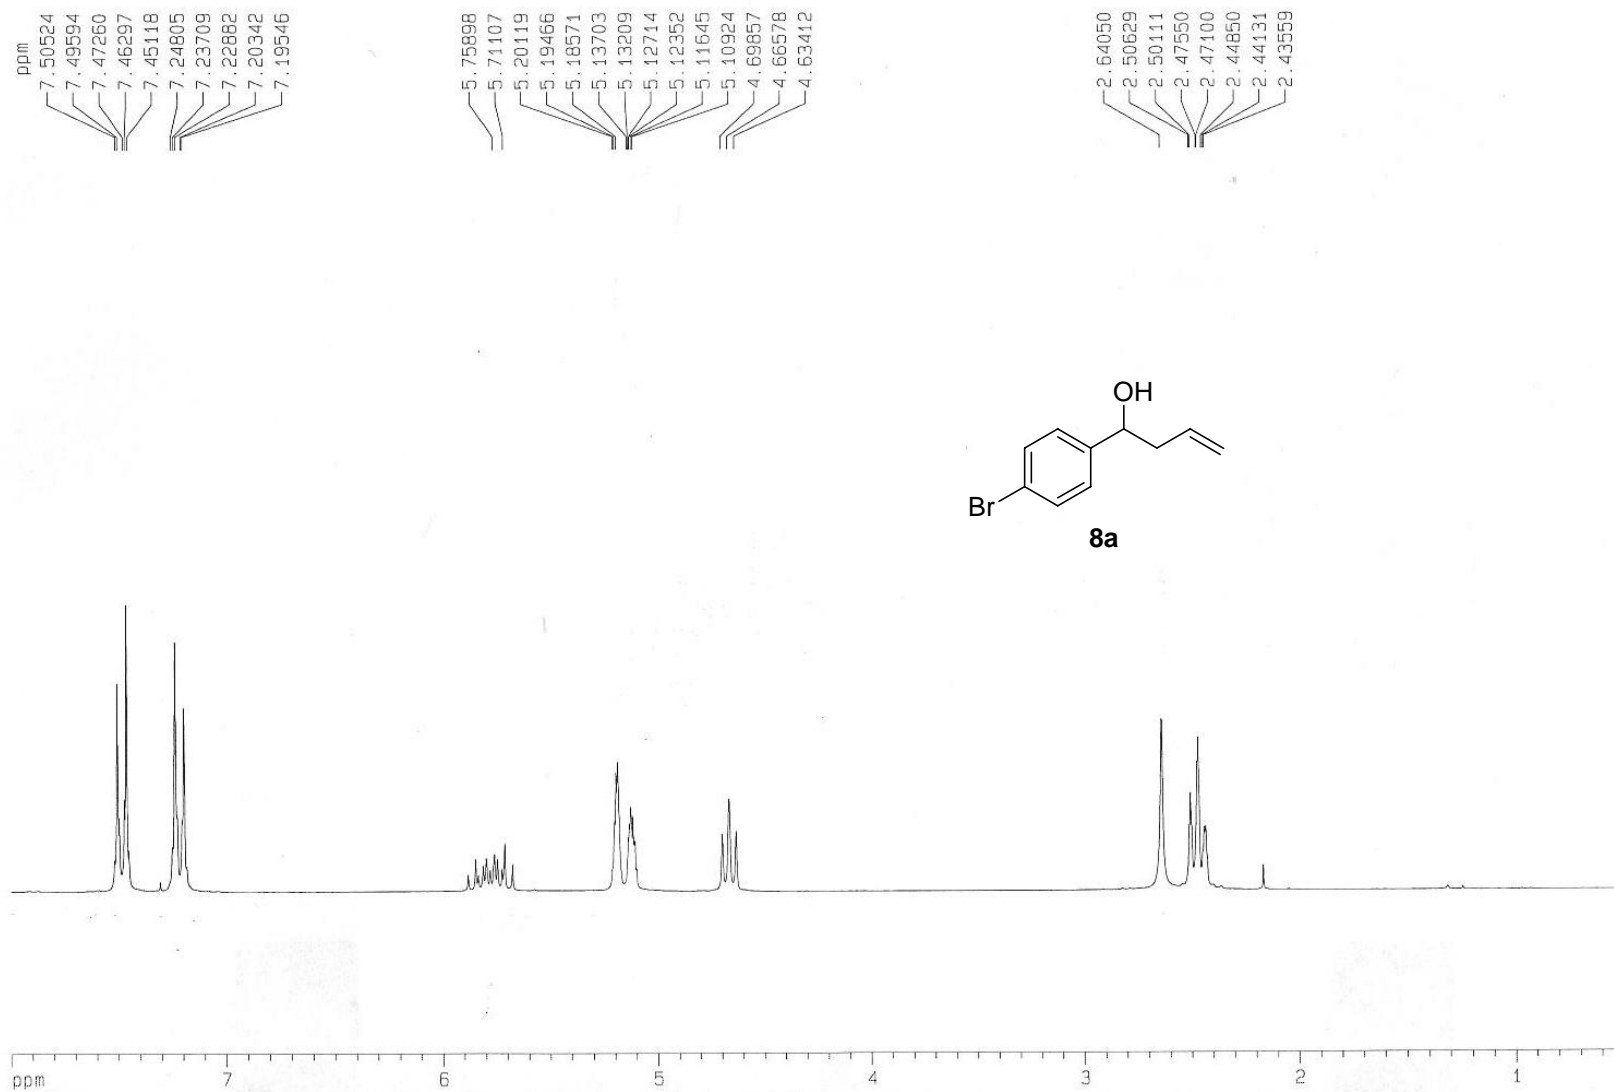

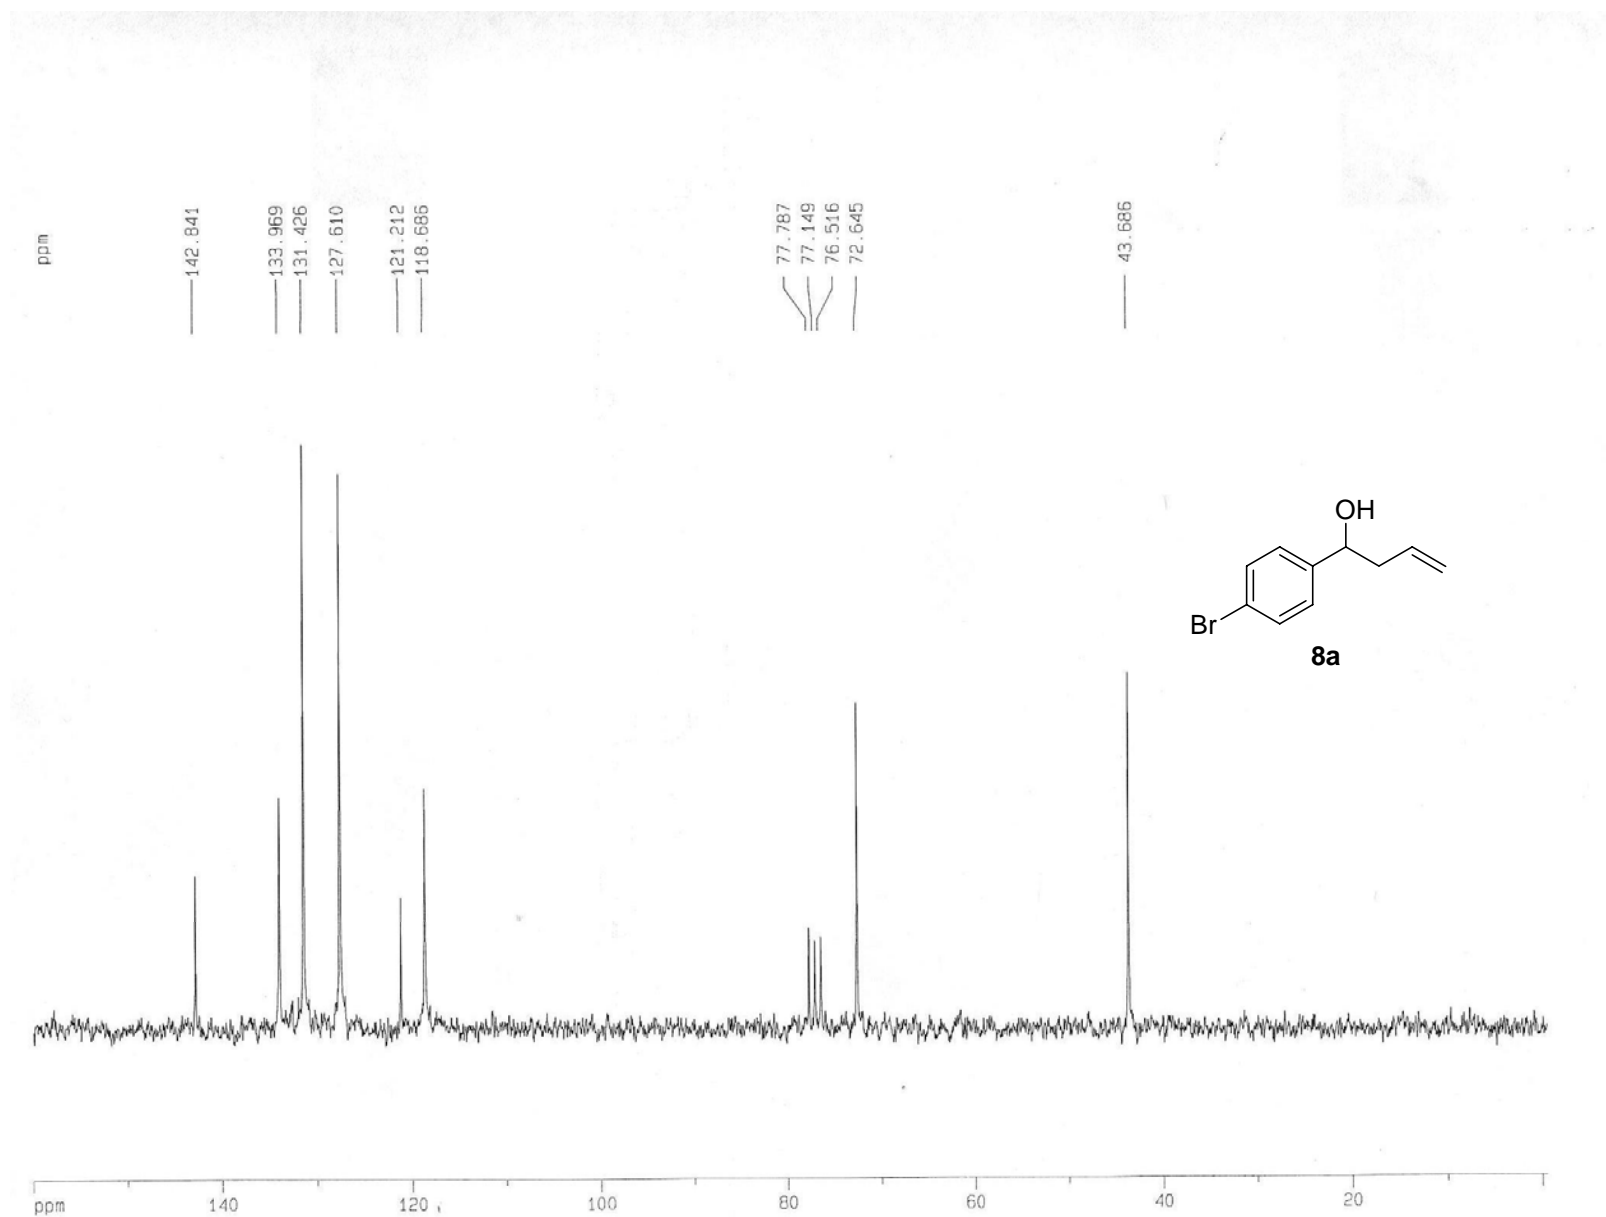

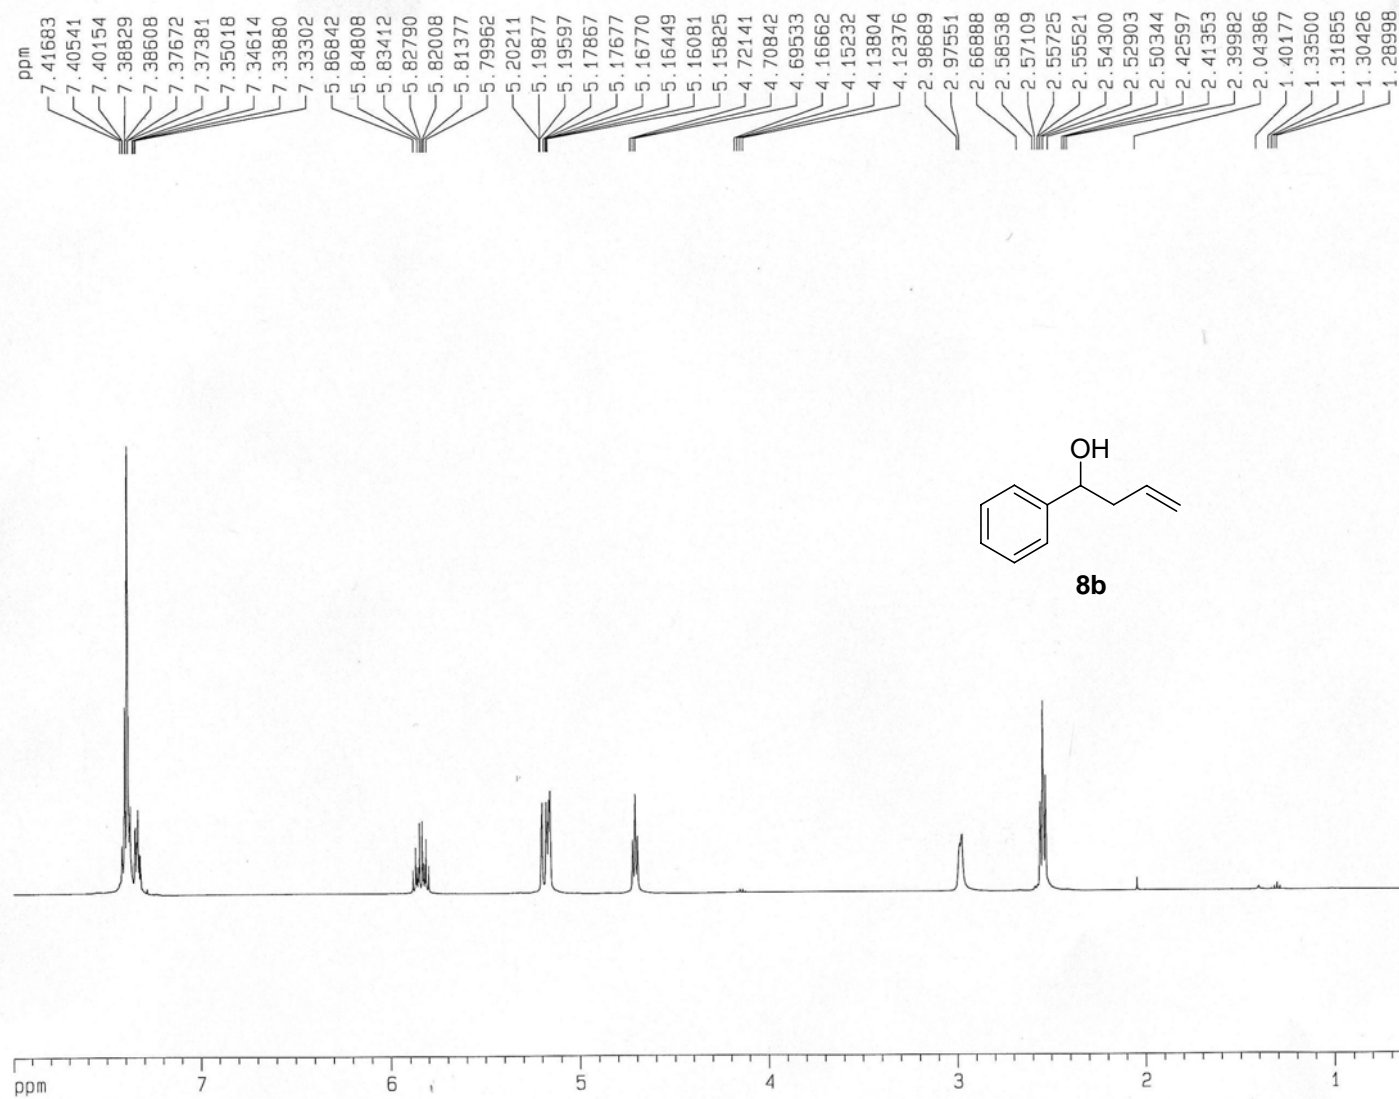

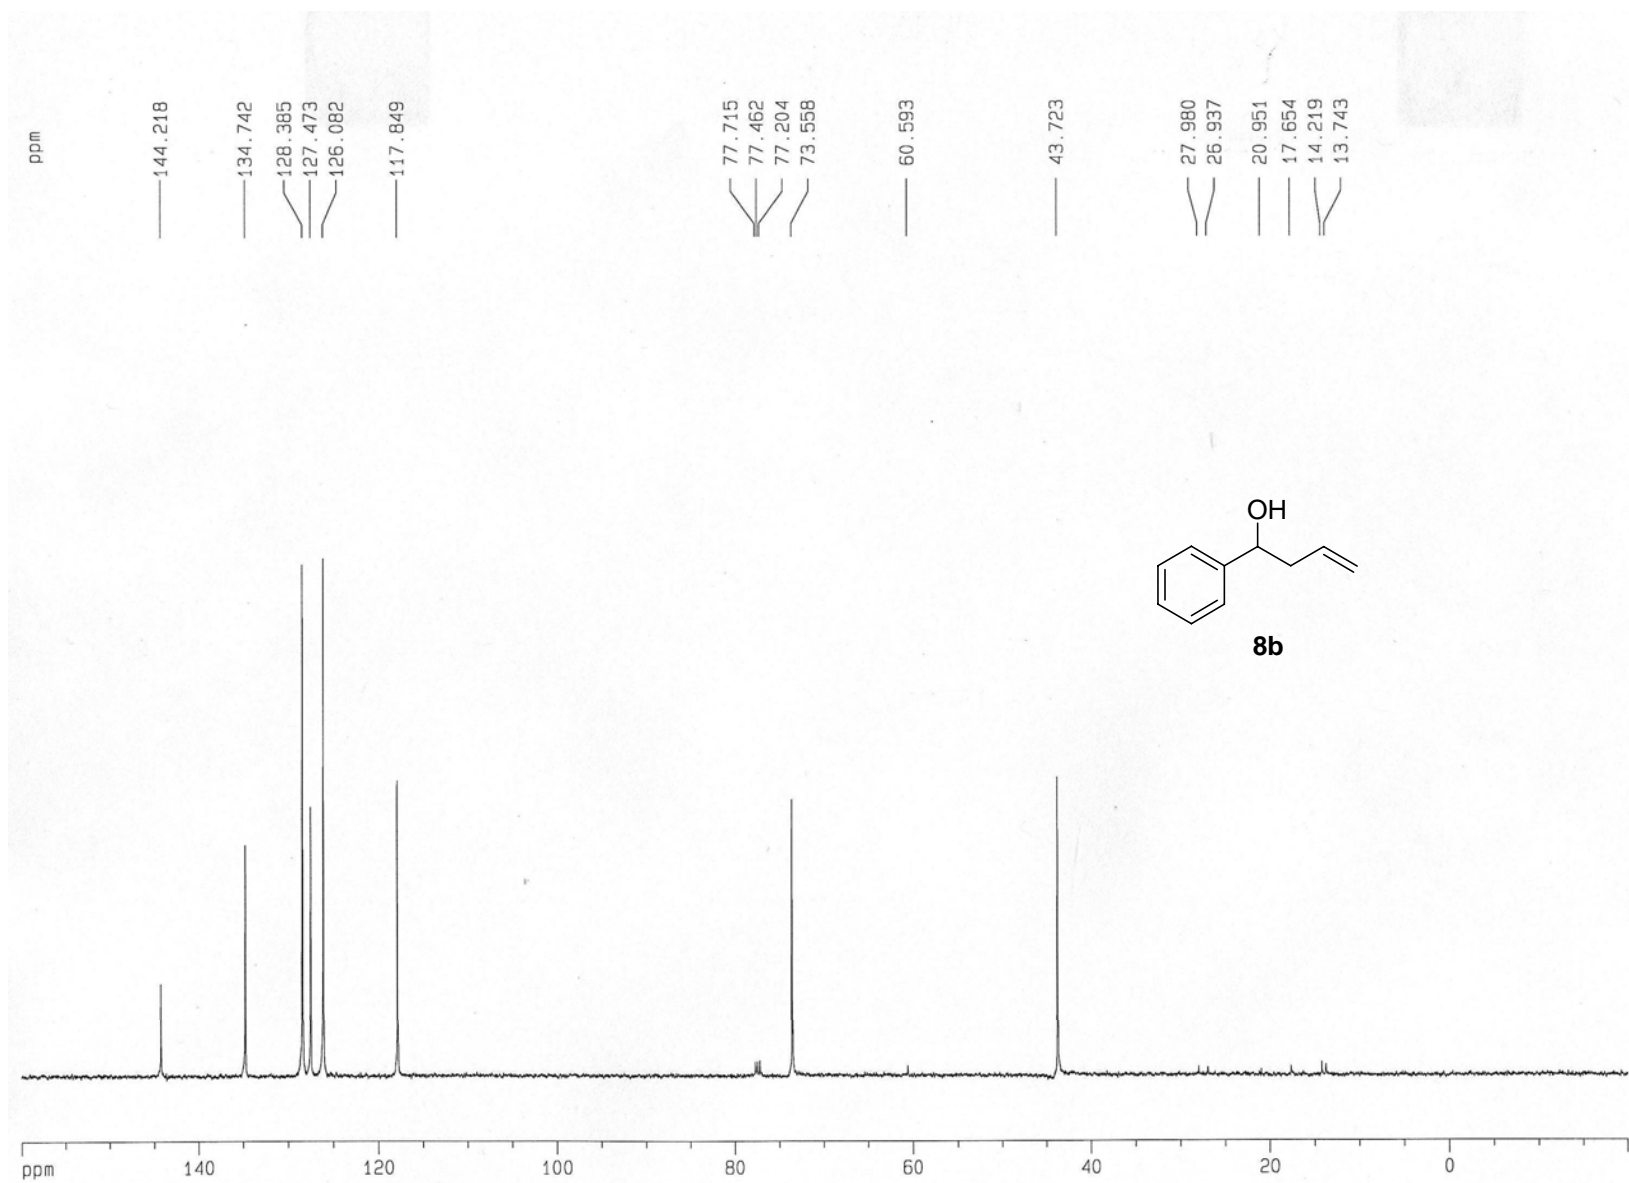



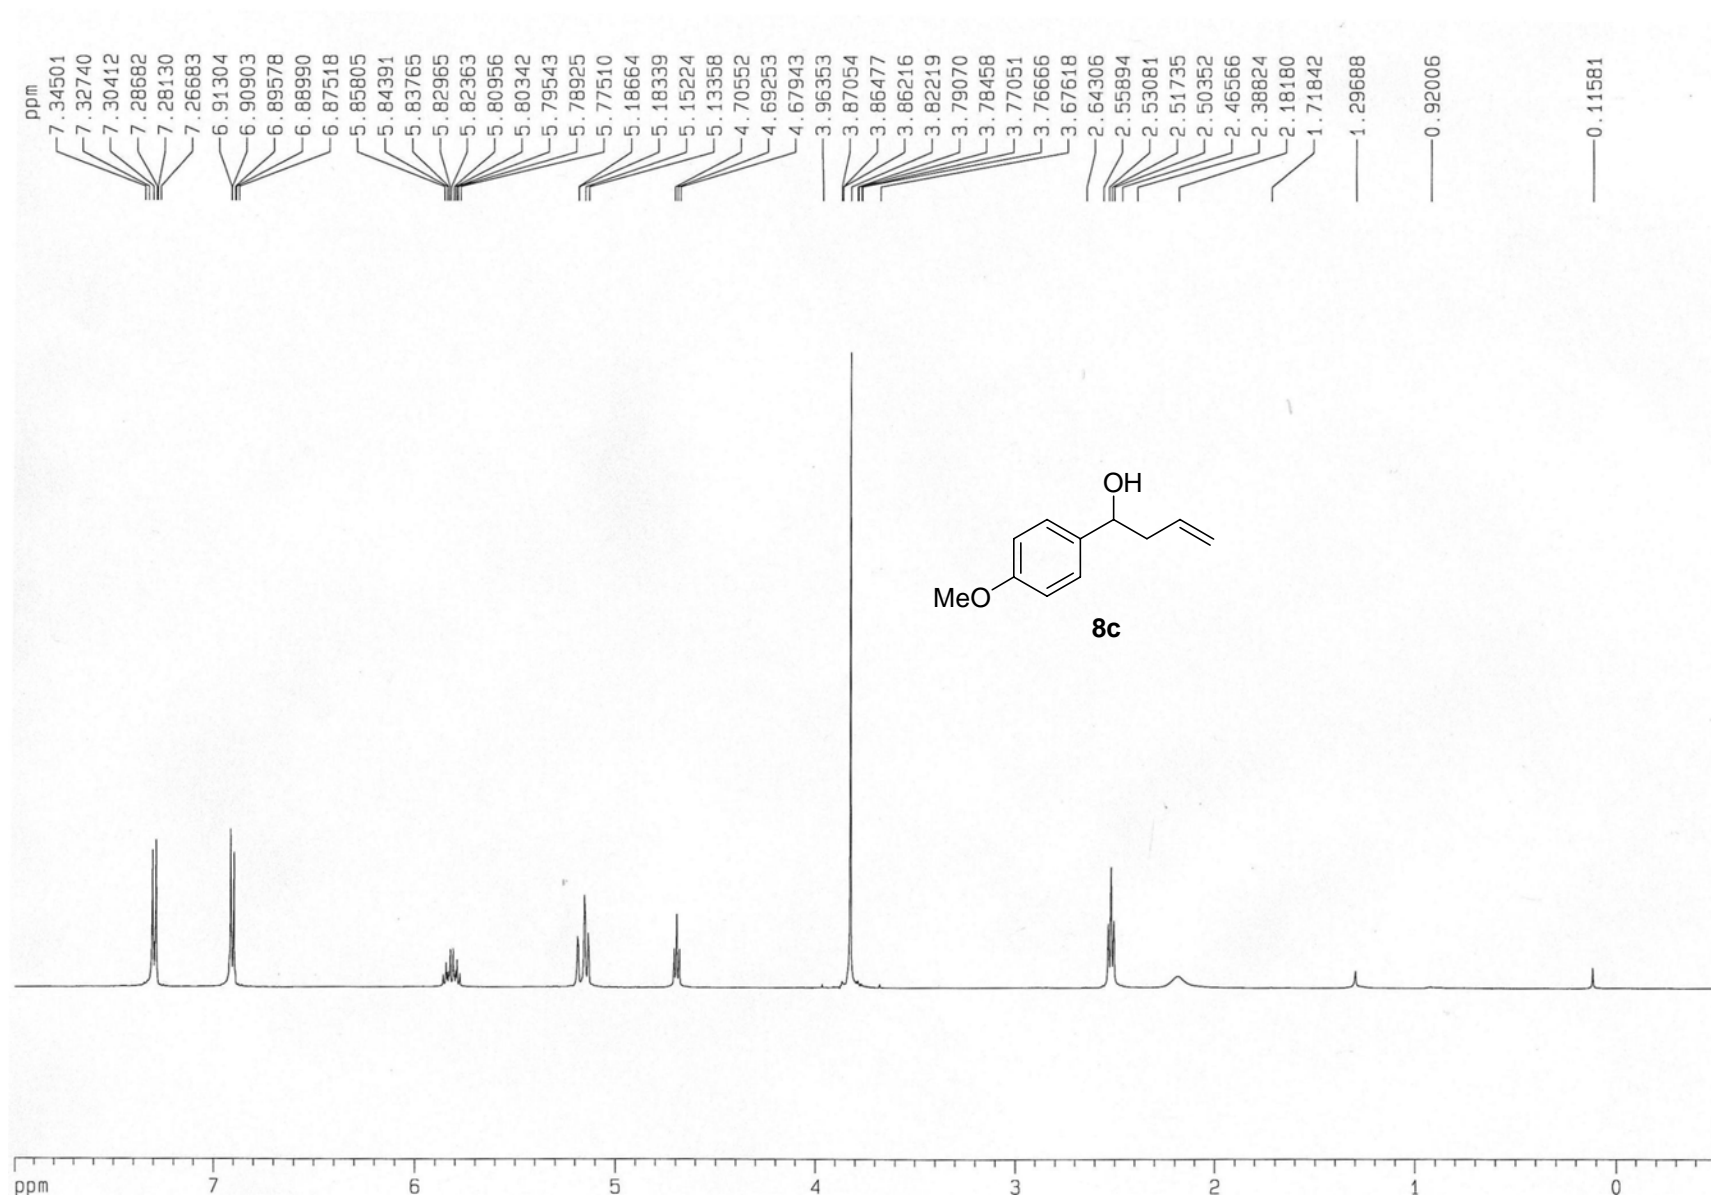

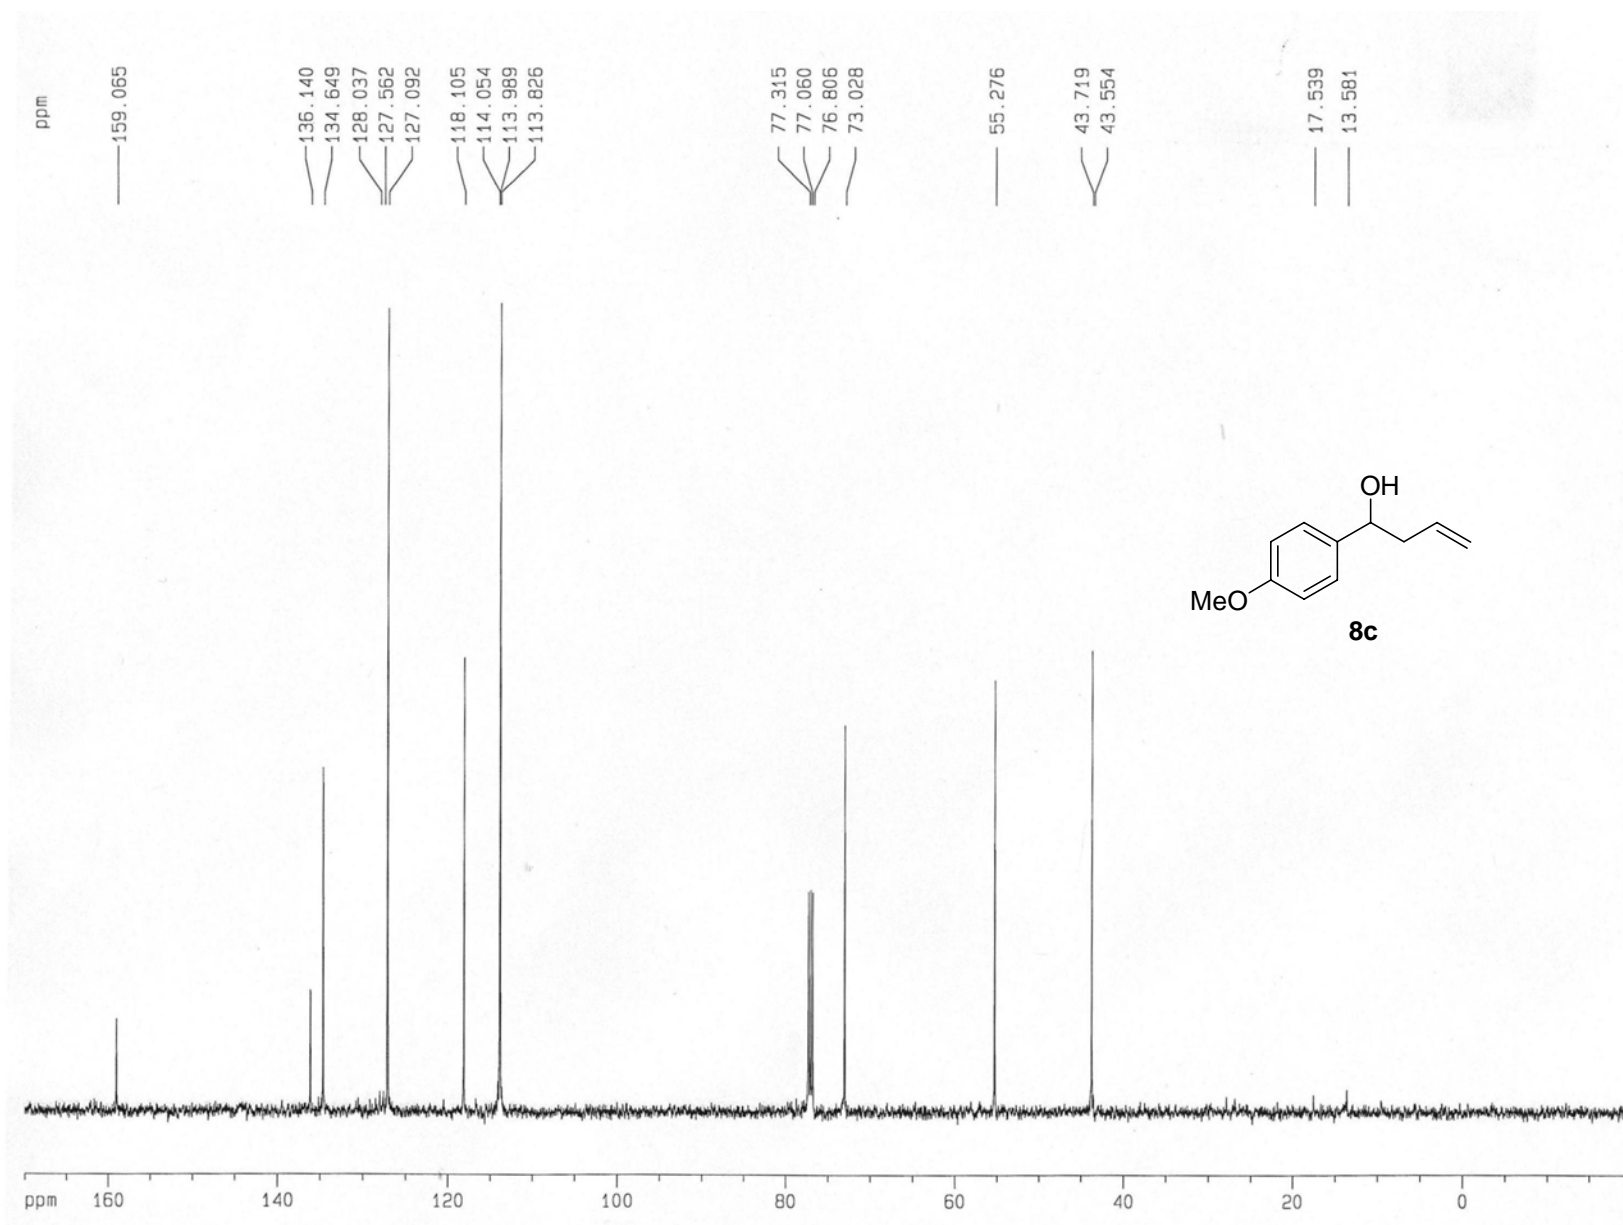

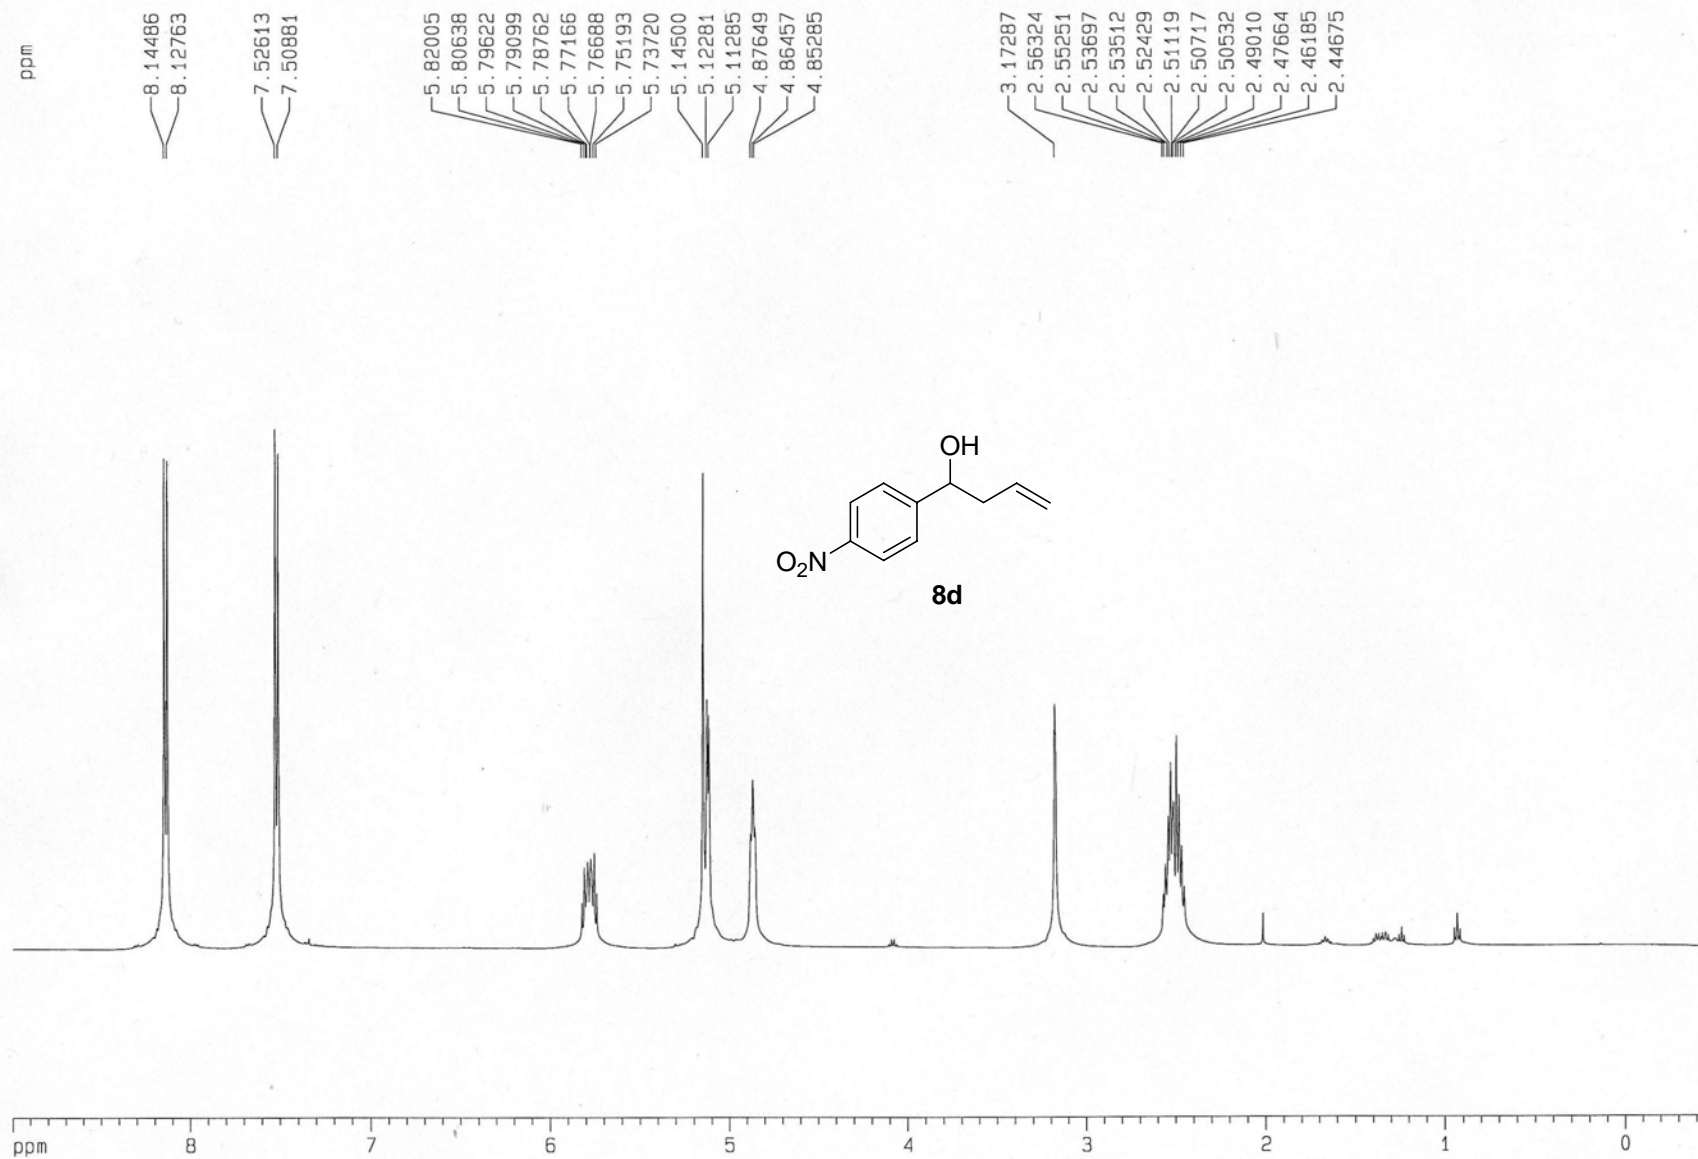

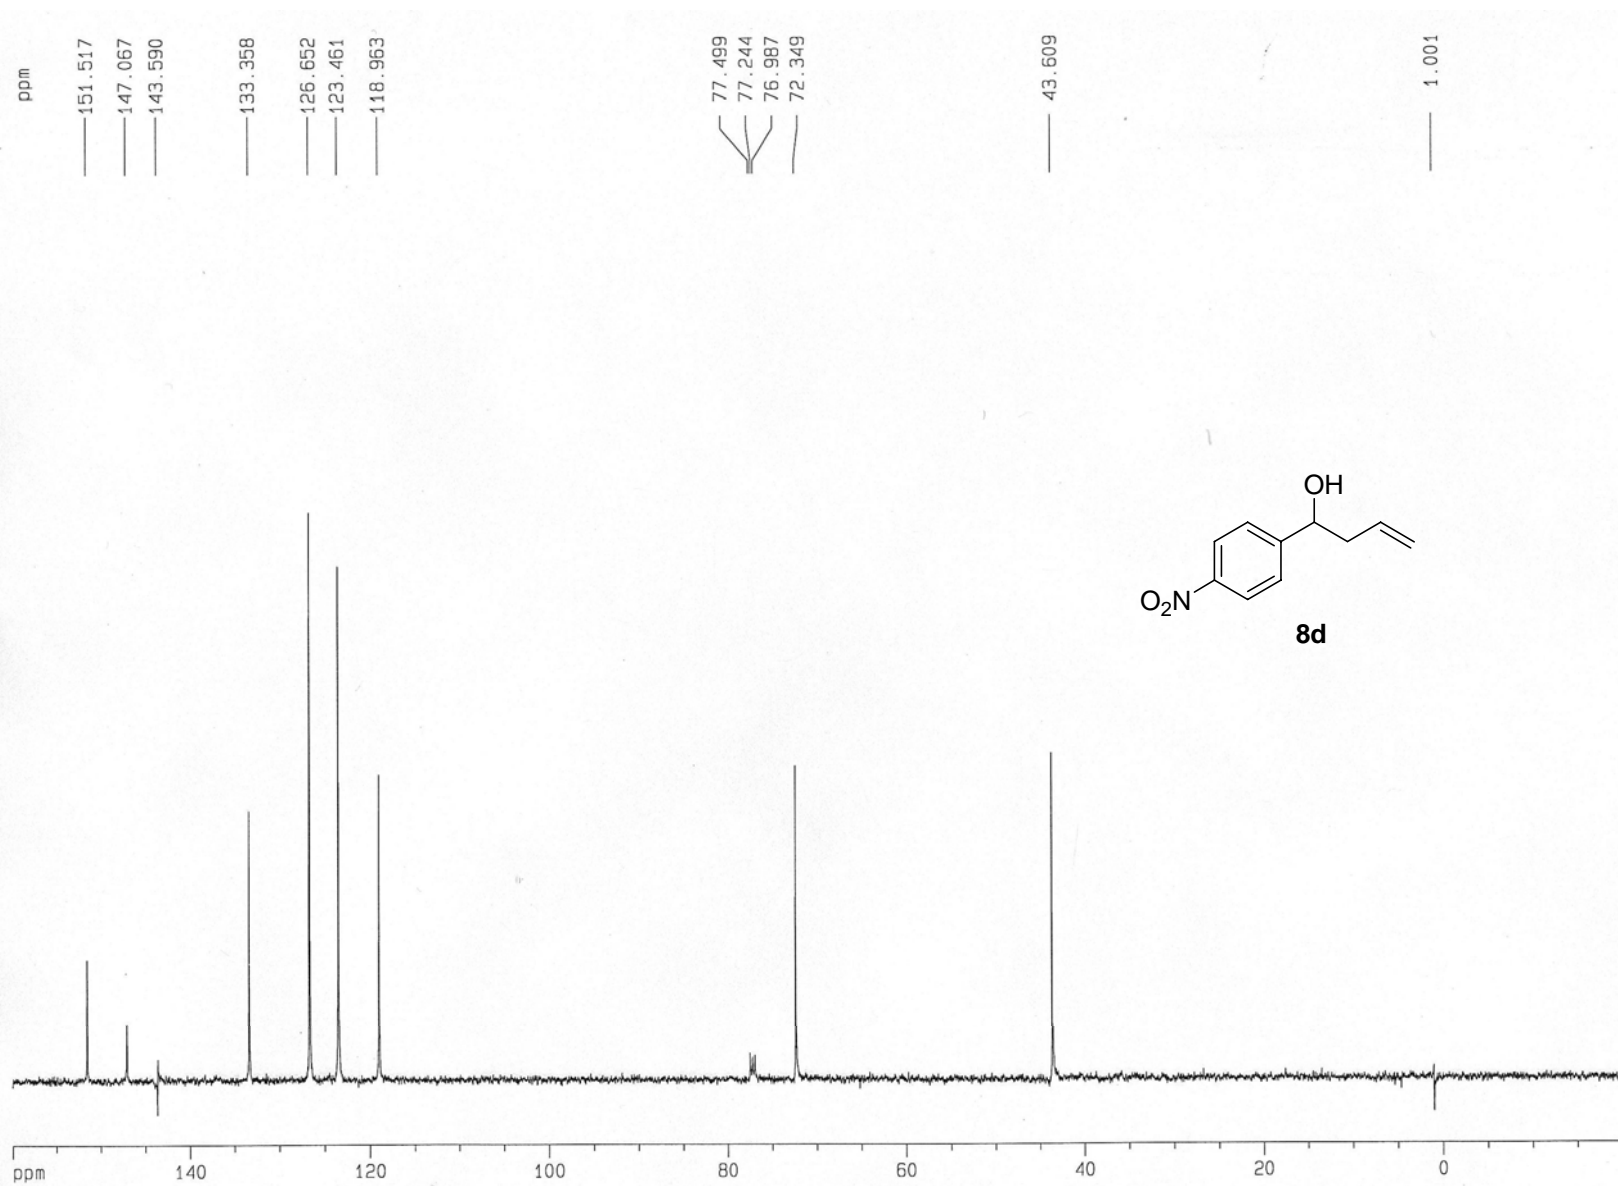

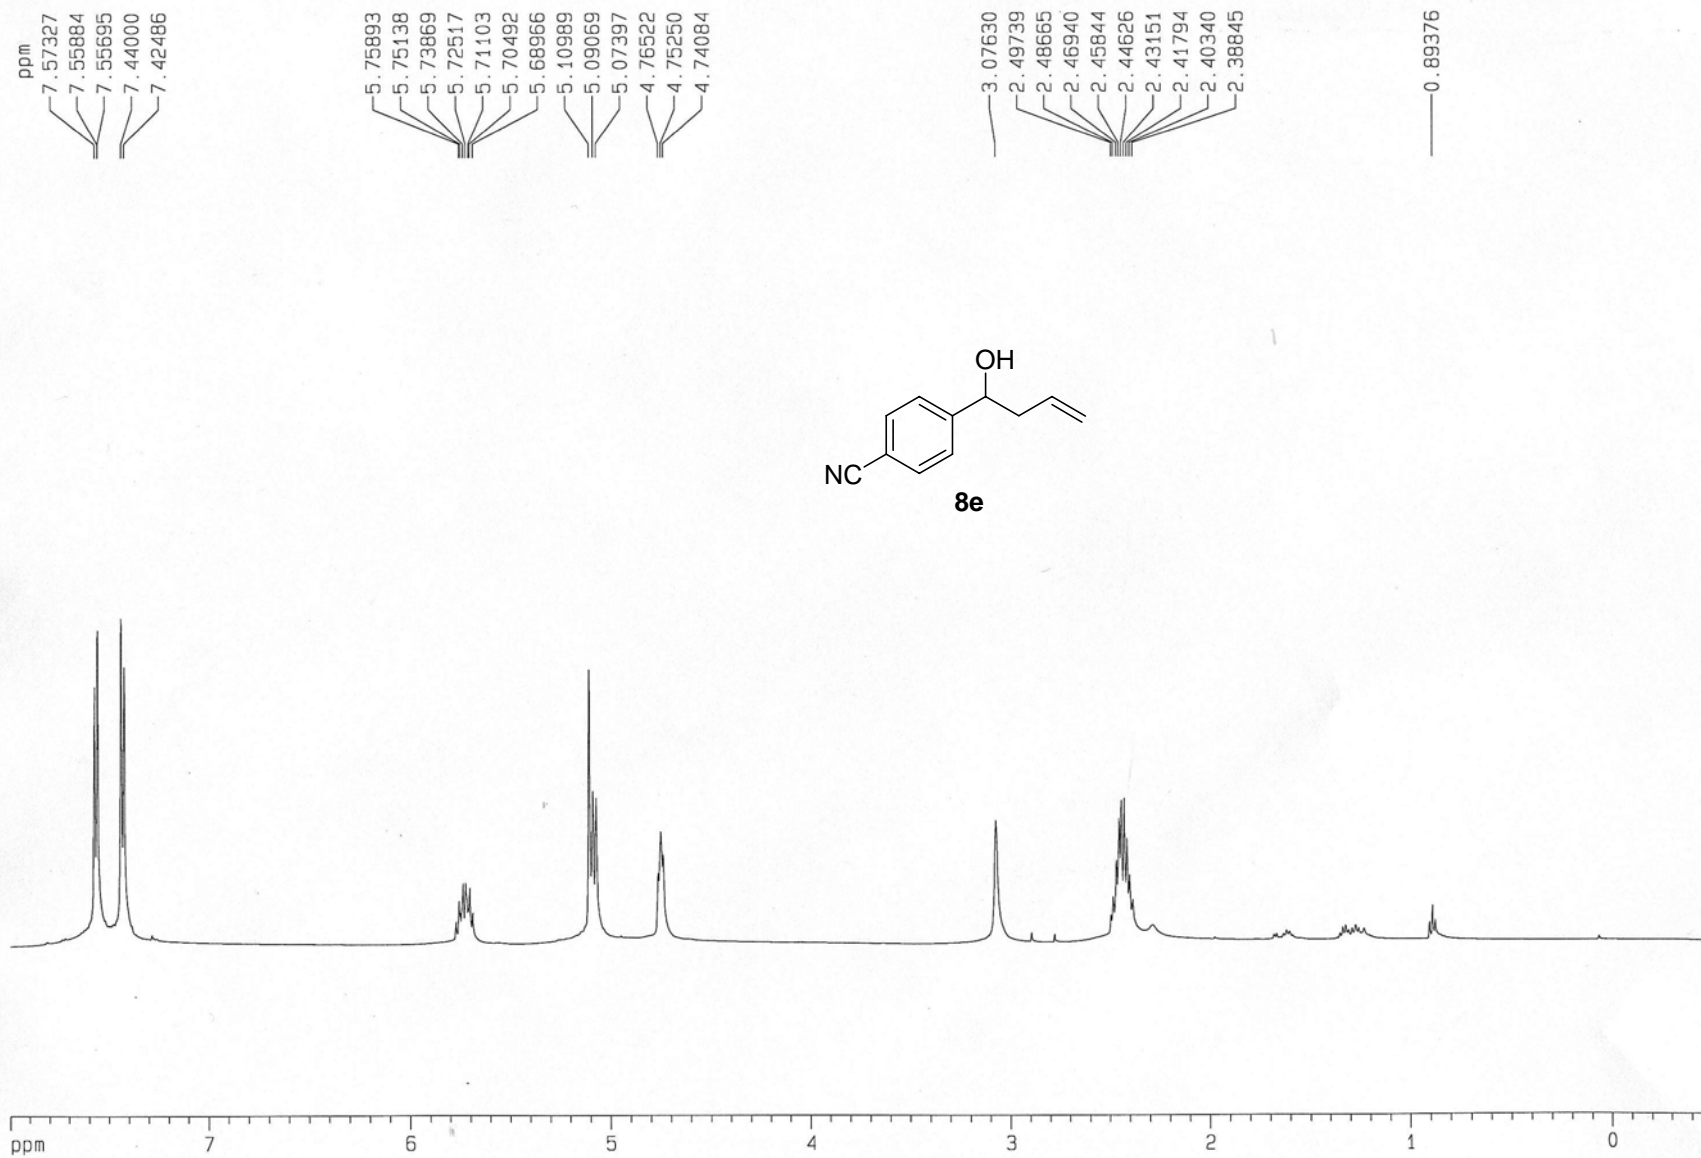

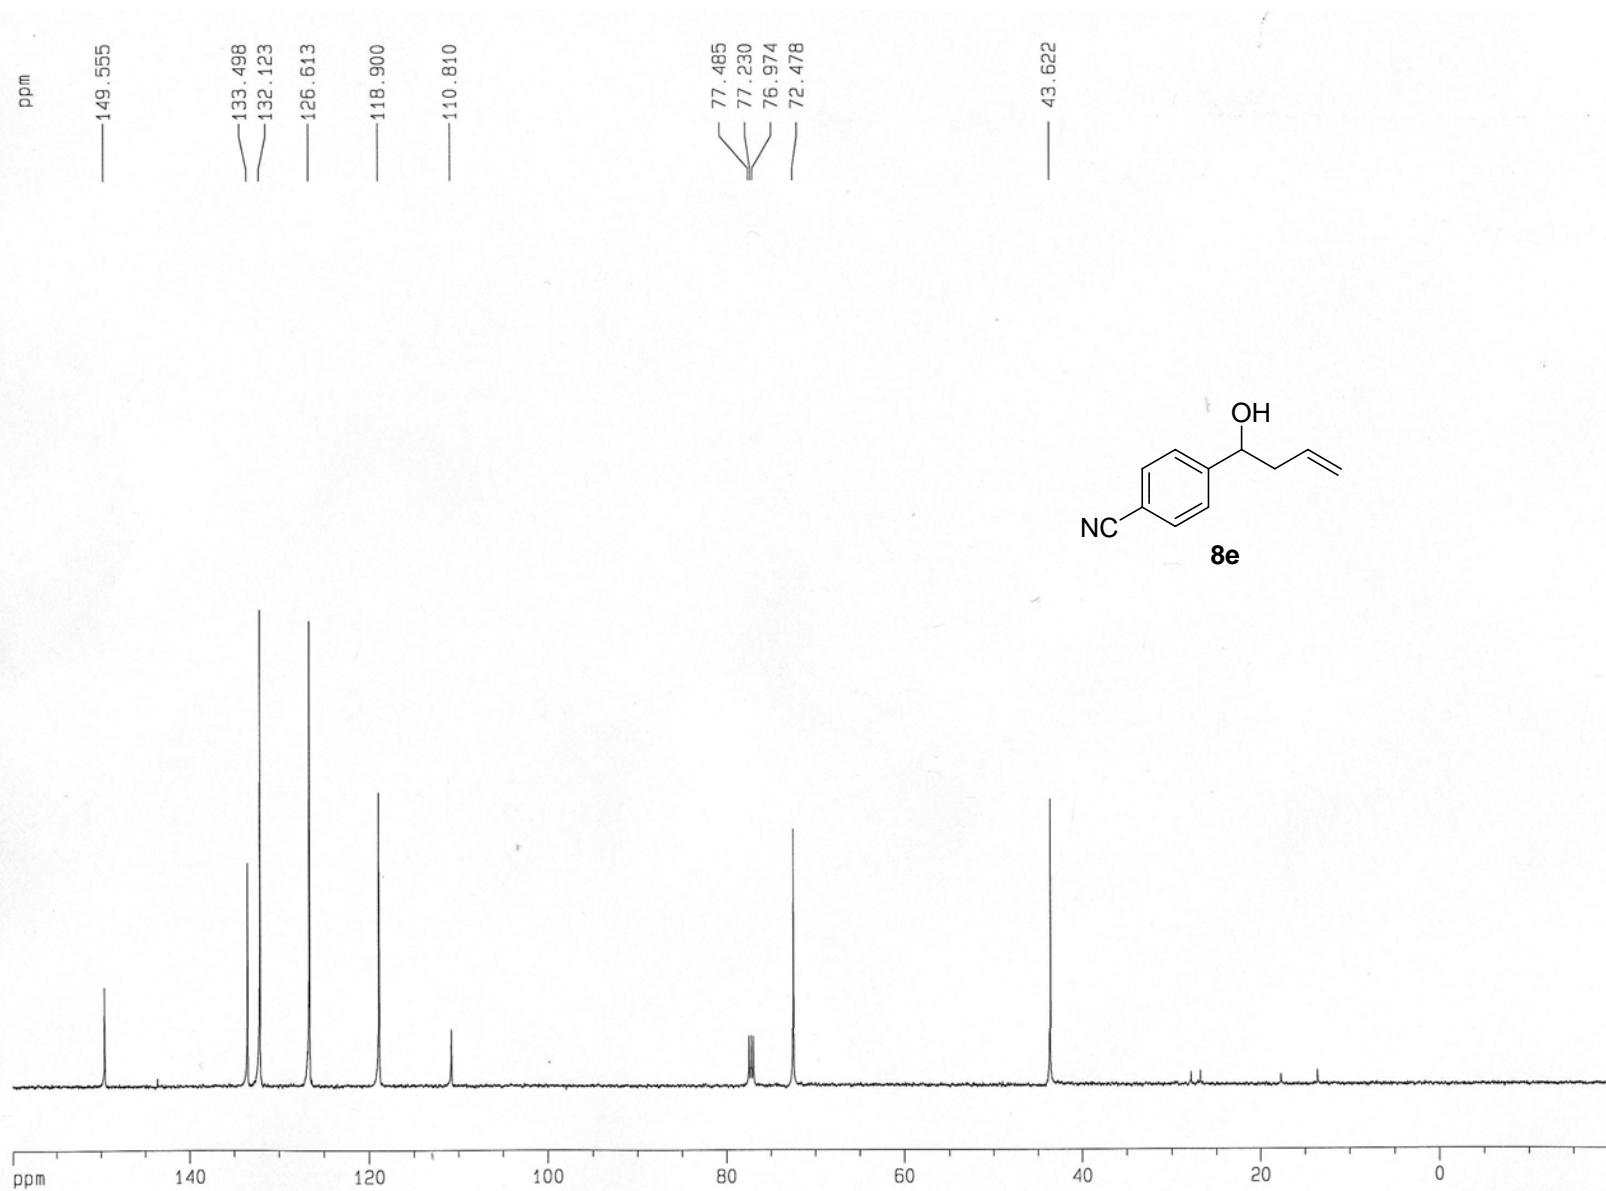

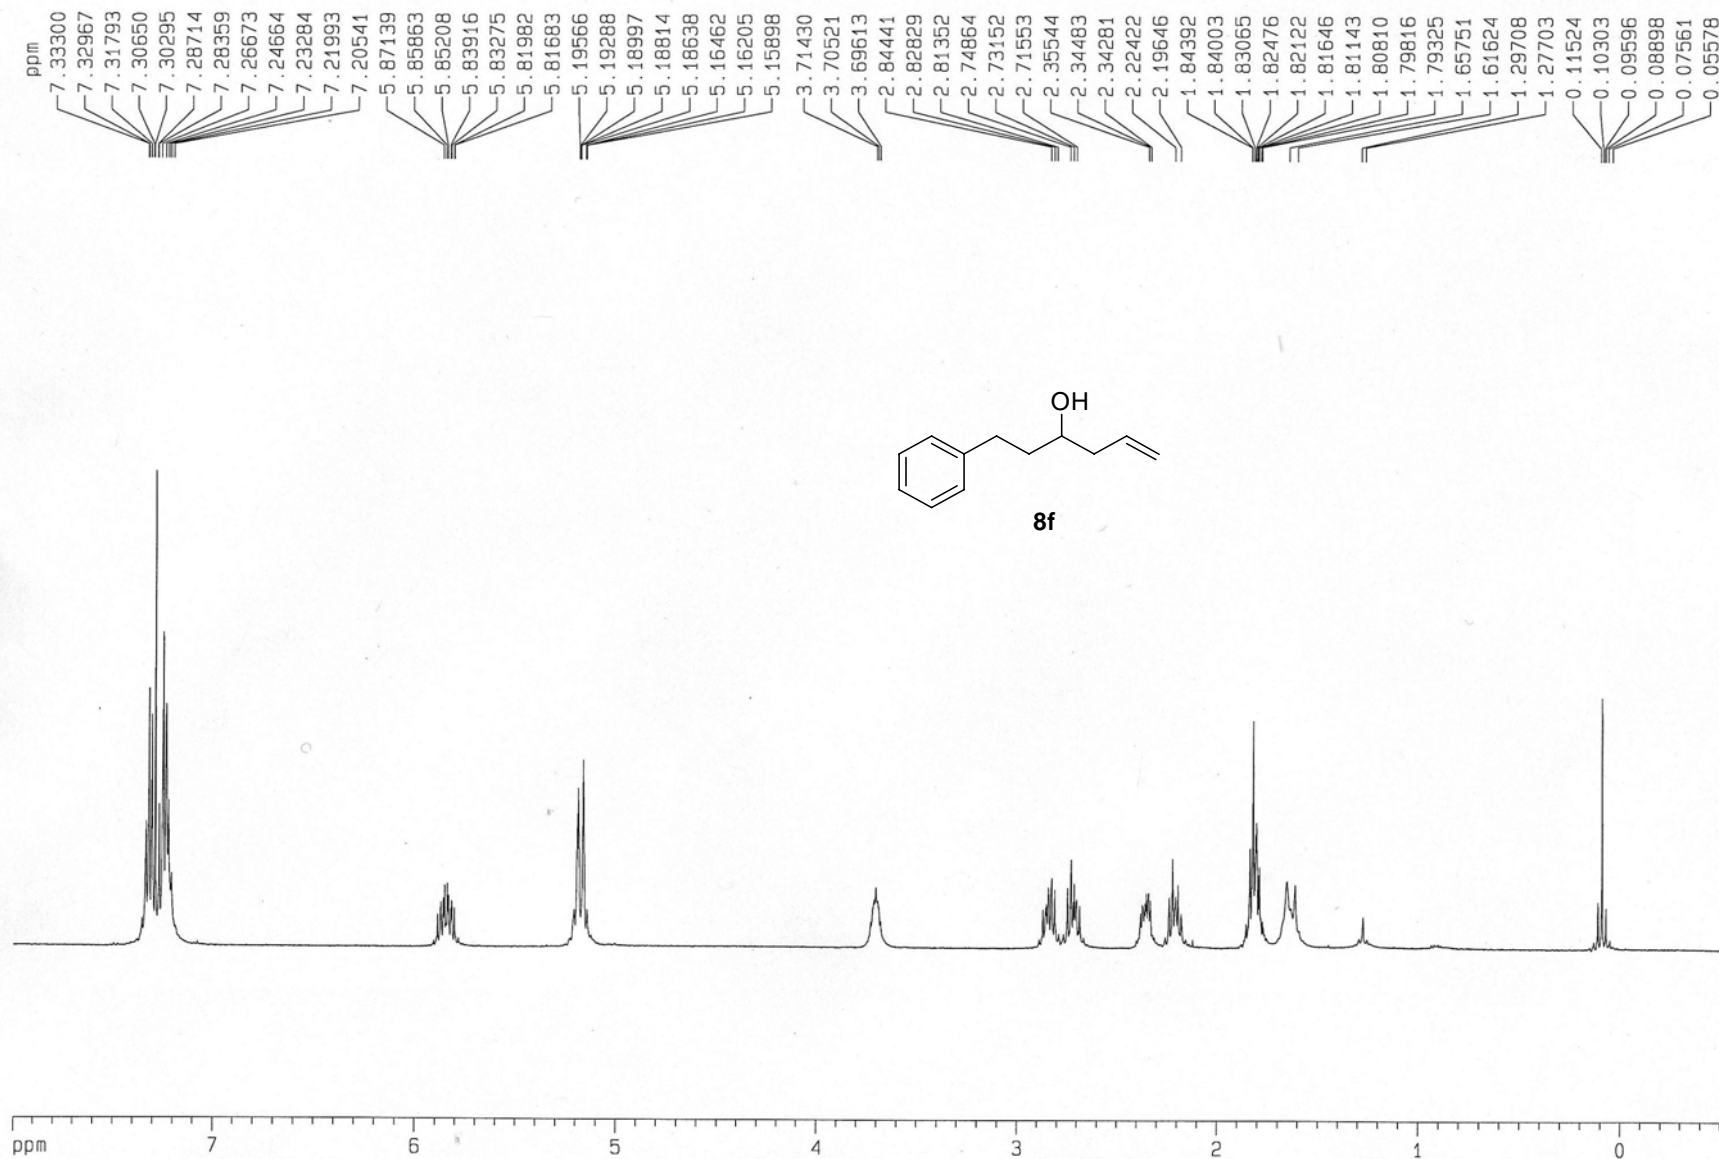

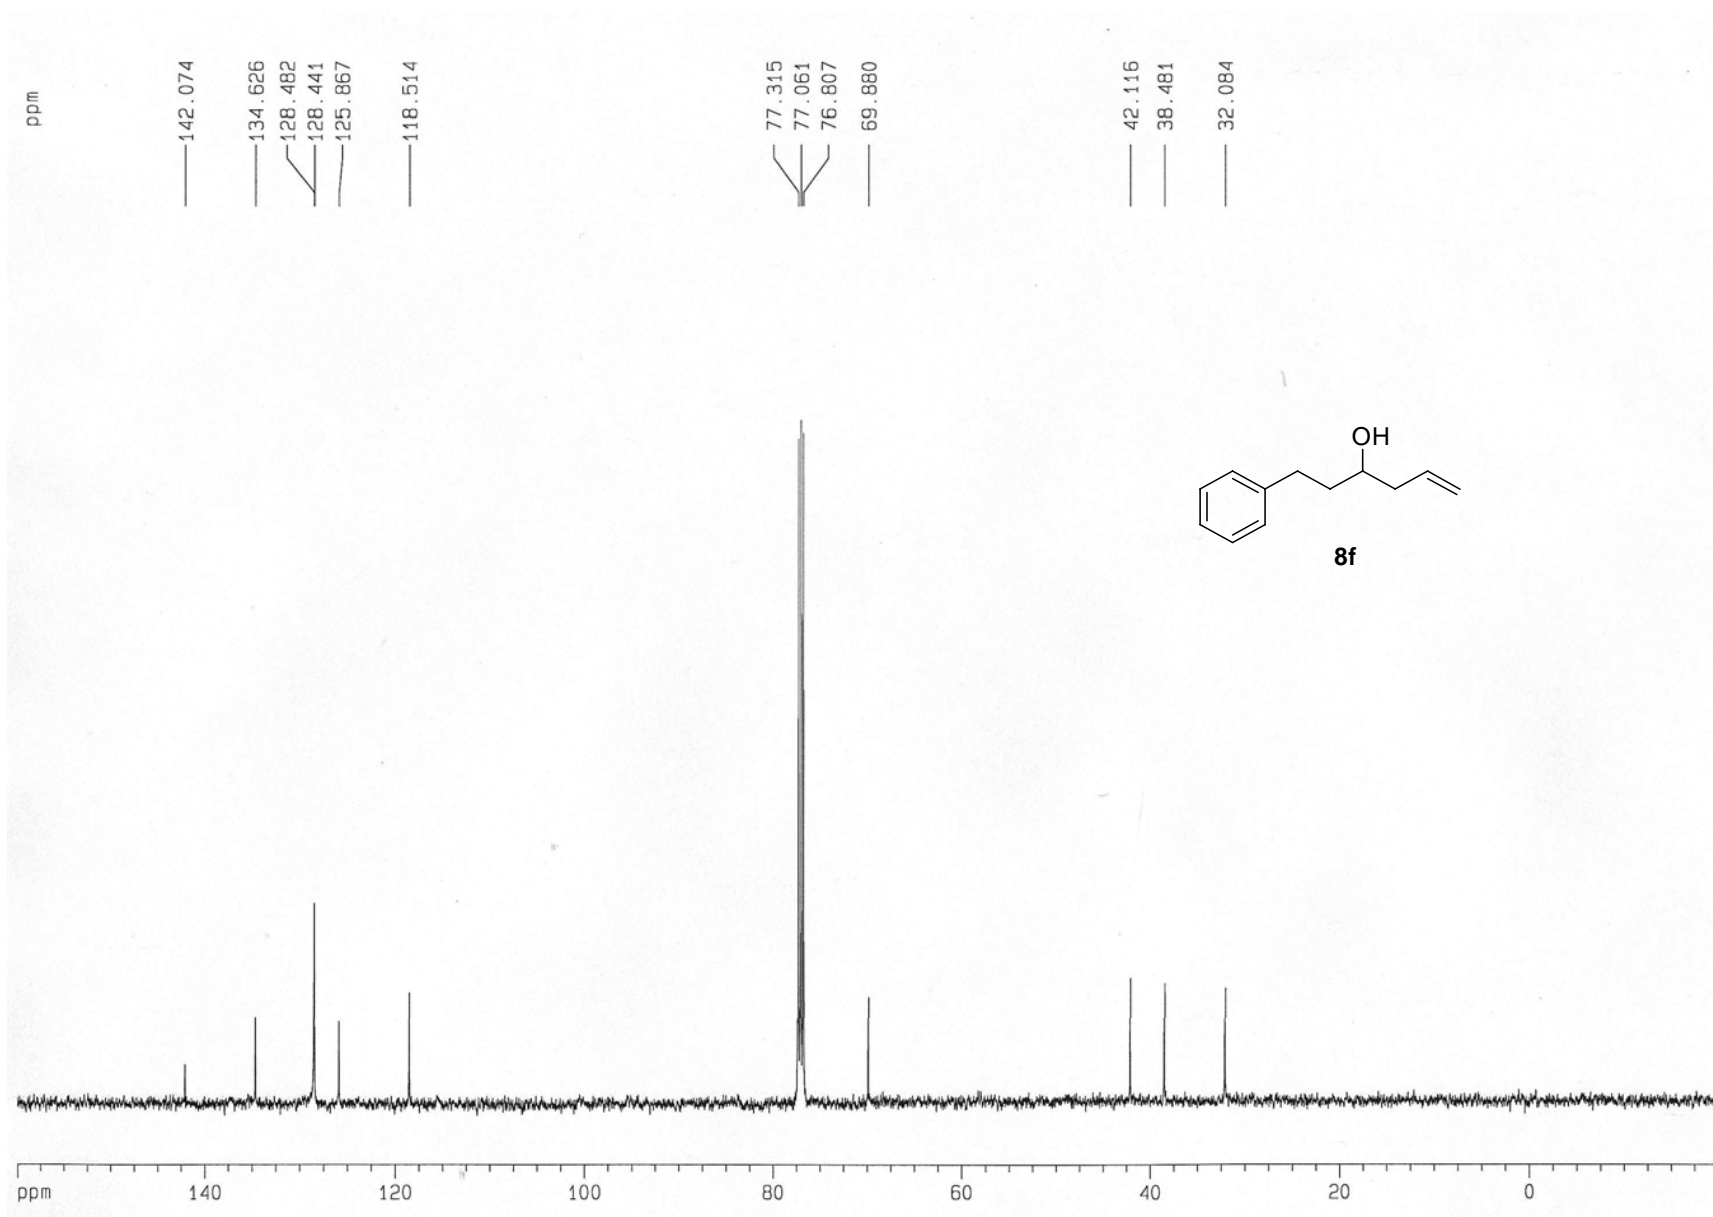



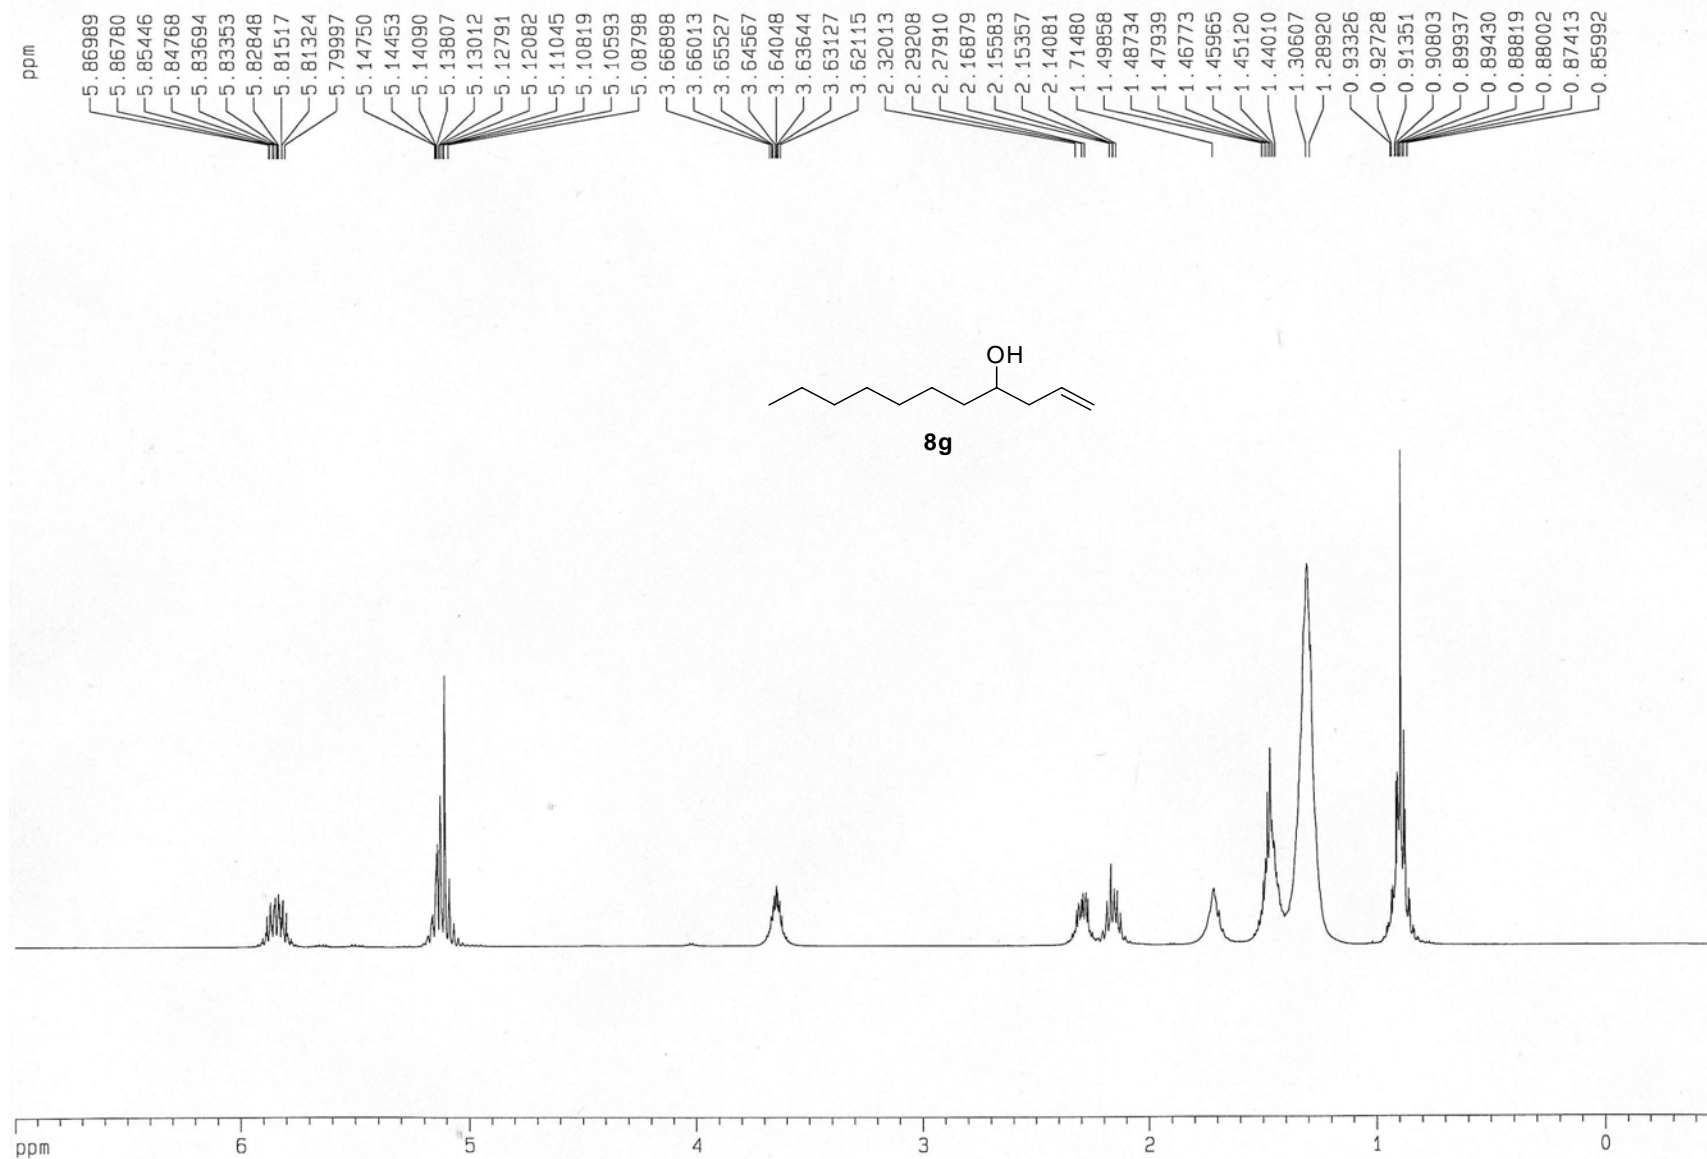

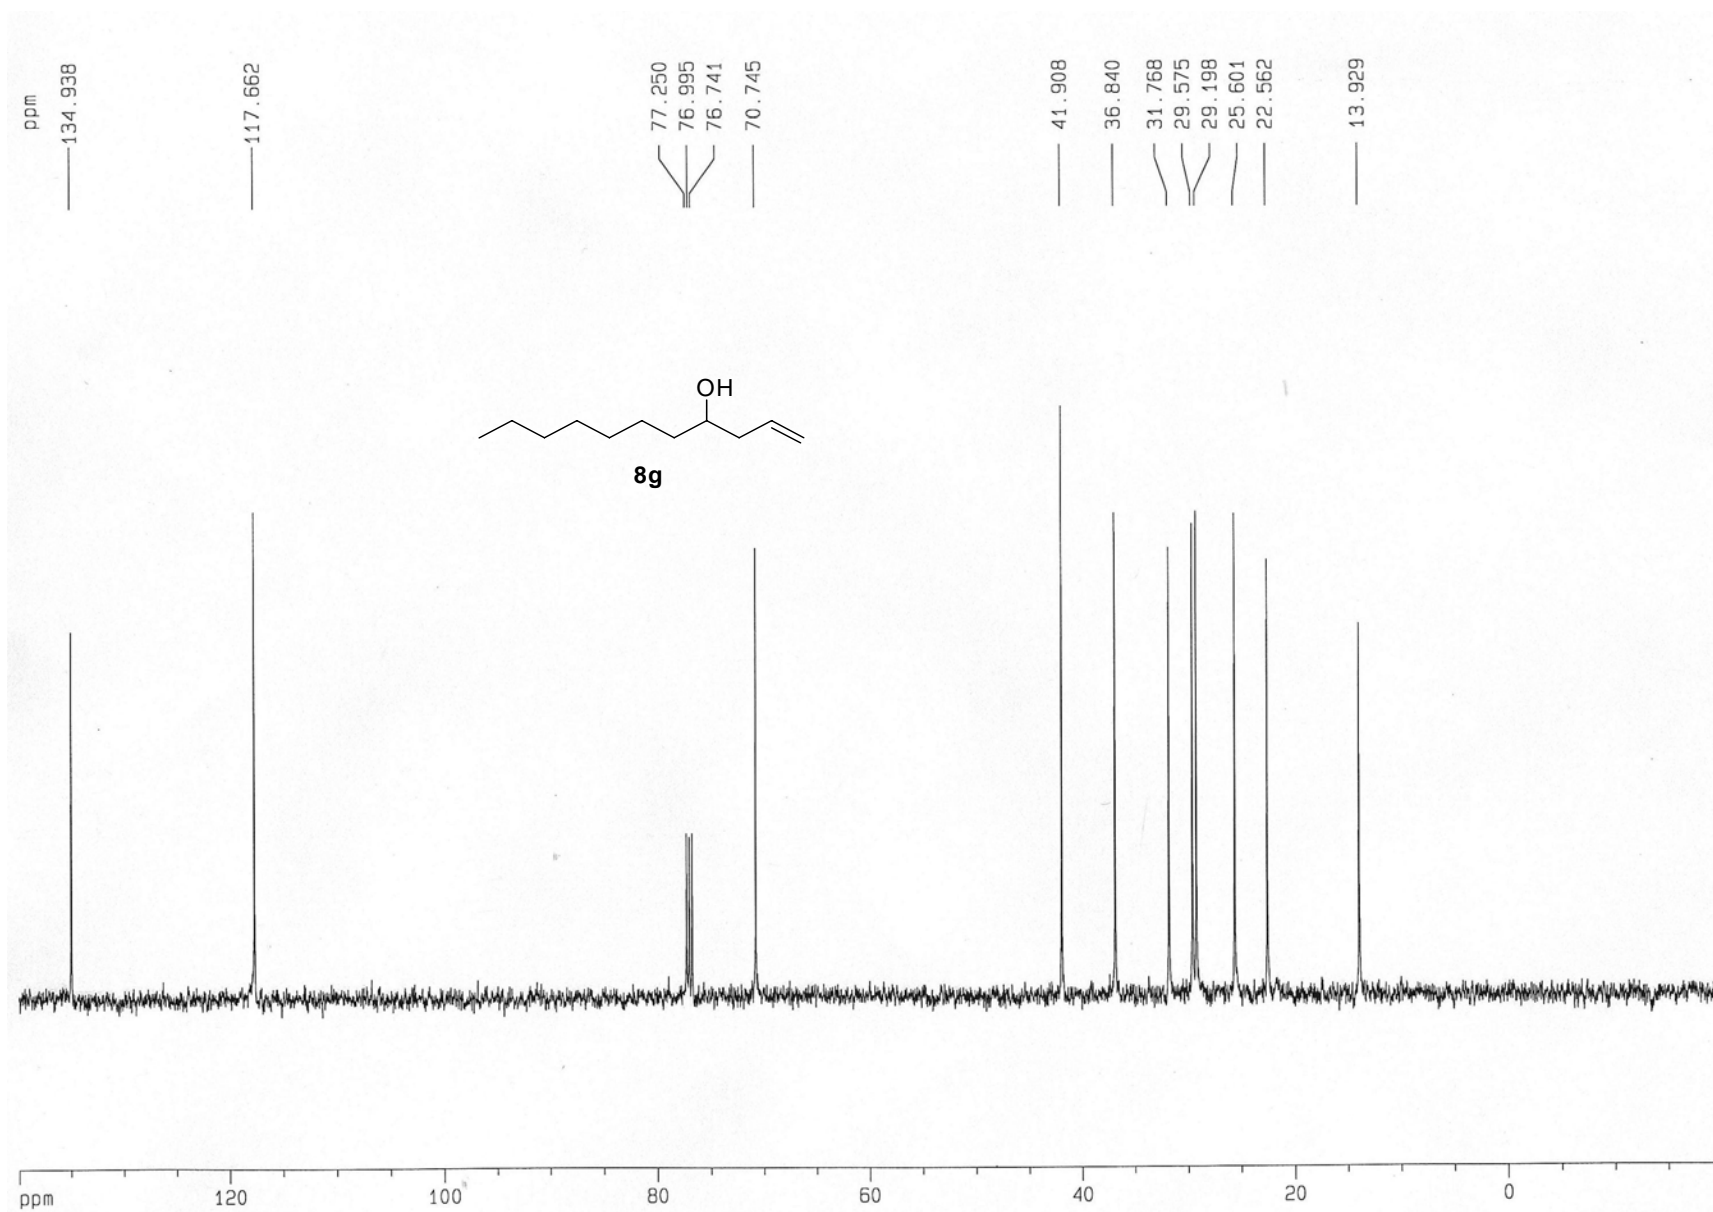

Supplement: Supplementary file 1 [file 4777756]
